# Supplementary material for: Genomics of diffusion-imaging integrating GWAS, exome data and single-cell sequencing unravels lifespan determinants of cerebral small vessel disease
Source: Research Square preprint supplement (doi:10.21203/rs.3.rs-5926137/v1), 2025-02-14
Supplement: Supplementary file 1 [file 210343cd6ad75dcdb11e3d3a.docx]

**Genomics of new automated diffusion imaging marker sheds light into lifespan determinants of cerebral small vessel disease**

**SUPPLEMENTARY DATA**

**Table of content**

[**SUPPLEMENTARY METHODS** 3](#_Toc174977641)

[Description of study populations 3](#_Toc174977642)

[Meta-analyses and related quality control 10](#_Toc174977643)

[Whole exome association analysis 10](#_Toc174977644)

[Number of independent phenotypes calculation for multiple testing correction 13](#_Toc174977645)

[Validation and expansion of findings across the lifespan and across ancestries 14](#_Toc174977646)

[LD-score regression 17](#_Toc174977647)

[Mendelian randomization 17](#_Toc174977648)

[Pathway analyses 17](#_Toc174977649)

[GWAS catalog 17](#_Toc174977650)

[Transcriptome-wide association studies 18](#_Toc174977651)

[Cell type enrichment analysis 18](#_Toc174977652)

[Lifetime brain gene expression profile 18](#_Toc174977653)

[**ACKNOWLEDGEMENTS** 18](#_Toc174977654)

[**REFERENCES** 28](#_Toc174977655)

# **SUPPLEMENTARY METHODS**

## Description of study populations

**1000BRAINS**

1000BRAINS is a large population-based cohort study on the variability of structure, function and connectivity in brain aging in relation to environmental and genetic risk factors.1 In total, 1,315 individuals, participated in 100BRAINS within the base acquisition. For the current study, 814 subjects with MRI and genotyped data were included. The samples are all of European ancestry. This subsample of 814 subjects (361 females, 453 males) was aged between 53 to 85 years (mean±S.D.: 67.42±6.77 years).

**Adolescent Brain and Cognitive Development (ABCD) study**

The Adolescent Brain Cognitive Development Study (ABCD) (<https://abcdstudy.org>) is a longitudinal study following brain development and health through adolescence.2 A total of nearly 12000 MRI scans with additional information on sex and age were available for download from the data release of April 2019 and of those 11393 images were processed successfully. The participants are of European ancestry. A total of 3705 stroke free participants with genotype data and PSMD assessment included for this analysis.

**AGES-Reykjavik Study (AGES)**

The AGES-Reykjavik Study is a single center prospective cohort study based on the Reykjavik Study. The Reykjavik Study was initiated in 1967 by the Icelandic Heart Association to study cardiovascular disease and risk factors.3 The cohort included men and women born between 1907 and 1935 who lived in Reykjavik at the 1967 baseline examination. Reexamination of surviving members of the cohort was initiated in 2002 as part of the AGE-Reykjavik Study. The AGES-Reykjavik Study is designed to investigate aging using a multifaceted comprehensive approach that includes detailed measures of brain function and structure. Briefly, as part of a comprehensive examination, all participants answered a questionnaire, underwent a clinical examination and had blood drawn. All consenting participants without contraindications were offered a brain MRI on a dedicated machine in the study center: a total of 5,003 participants had an MRI. Of these, 3,664 were genotyped at the Laboratory of Neurogenetics, Intramural Research Program, NIA, Bethesda, Maryland, and 3,219 participants passed QC criteria for genotyping. Of these, 2,875 had complete genotyping and MRI data with assessment of PSMD was available. A total of 235 participants with stroke or other pathologies that may have an effect on PSMD assessment were excluded, leaving 2,640 for these analyses.

**Austrian Stroke Prevention Family Study (ASPS-Fam)**

ASPS-Fam represents an extension of the Austrian Stroke Prevention Study (ASPS), which was established in 1991.4,5 Between 2006 and 2013, study participants of the ASPS and their first-grade relatives were invited to enter ASPS-Fam.4,5 Inclusion criteria were no history of previous stroke or dementia and a normal neurologic examination. A total of 419 individuals from 176 families were included into the study. The number of members per family ranged from 2 to 6. The entire cohort underwent a thorough diagnostic workup including clinical history, laboratory evaluation, cognitive testing, and an extended vascular risk factor assessment. They were all European Caucasians. 249 participants were passed genotyping quality control and had PSMD assessment on brain MRI were available for these analyses.

**Atherosclerosis Risk In Communities Study (ARIC)**

The ARIC study is a population-based cohort study of atherosclerosis and clinical atherosclerotic diseases in 15,792 men and women, including 11,478 white and 4,266 black participants were recruited from four U.S. communities: Suburban Minneapolis, Minnesota; Washington County, Maryland; Forsyth County, North Carolina; and Jackson, Mississippi. In the first 3 communities, the sample reflects the demographic composition of the community.6 In Jackson, only black residents were enrolled. Participants were handed a card and asked to tell the interviewer which best described his or her race. Choices offered were: White, Black, American Indian/Alaskan Native, Asian/Pacific Islander, Other: specify. Over 99% identified as either white or black. Only self-identified blacks were included in for COMPASS. Participants were between age 45 and 64 years at their baseline examination in 1987-1989 when blood was drawn for DNA extraction and participants consented to genetic testing. Only individuals free of stroke or TIA at baseline were included in the analysis. During the first 2 years (1993-1994) of the third ARIC examination (V3), participants aged 55 and older from the Forsyth County and Jackson sites were invited to undergo cranial MRI. This subgroup of individuals with MRI scanning represents a random sample of the full cohort because examination dates were allocated at baseline through randomly selected induction cycles. After excluding individuals with prevalent stroke at V3, a total of 808 white and 798 black participants had phenotypic and genome-wide genotypic data.

**Brain Imaging of Lateralization by the Groupe d’Imagerie Fonctionnelle (BIL & GIN)**

The BIL & GIN database has been described in detail elsewhere.7 Briefly, 453 young healthy volunteers were recruited, the sample being balanced for handedness and sex. Diffusion –weighted imaging (DWI) was available in a subsample of 410 participants (209 females, 201 males) aged between 18.1 and 57.2 years (mean±SD: 26.9±8.0), with a level of schooling superior or equal to 12 years (=French baccalaureate, UK A levels, or US high school diploma). DNA has been extracted from 297 individuals. 260 participants were passed genotyping quality control and had PSMD assessment on brain MRI were available for these analyses.

**Coronary Artery Risk Development in Young Adults (CARDIA) Study**

The CARDIA study is a population based, prospective cohort examining the development and determinants of clinical and subclinical cardiovascular disease and its risk factors.8 The CARDIA study initial enrollment consisted of 5,115 European Americans and African American men and women between 18 and 30 years old (52% African American and 55% women). The study is multicenter with recruitment in Birmingham, AL; Chicago, IL; Minneapolis, MN; and Oakland, CA. The IRB at each of the study sites approved the study protocols, and written informed consent was obtained from all participants. Baseline measurements were repeated, and additional measurements performed, at Years 2, 5, 7, 10, 15, 20, and 25. All participants gave informed consent and the study was approved by all relevant institutional review boards for human use.

**Framingham Heart Study (FHS)**

The FHS study is a 3-generation community-based and prospective cohort that was initiated in 1948 to investigate risk factors for cardiovascular disease including stroke. It comprises 3 generations of participants: the original cohort followed-up since 1948 (original)9 their offspring, followed-up since 1971 (offspring),10 and children from the largest offspring families enrolled in 2002 (Gen 3).11 The original cohort enrolled 5,209 men and women who comprised two-thirds of the adult population then residing in Framingham, Massachusetts. Survivors continue to receive biennial examinations. The offspring cohort comprises 5,124 persons (including 3,514 biological offspring) who have been examined approximately once every 4 years. Participants in the Original and Offspring cohorts have been invited to undergo brain MRI since 1999. Brain MRI in Gen 3 only began in 2007 and is not included in these analyses. The population of Framingham was virtually entirely white in 1948, when the original cohort was recruited. FHS participants are under continuous surveillance for neurological outcomes including transient ischemic attack, stroke, and dementia10,11 Participants had DNA extracted and provided consent for genotyping in the 1990s. Genotyping was performed at Affymetrix (Santa Clara, Calif) through an NHLBI-funded SNP-Health Association Resource (SHARe) project. Totally, 2,887 participants with PSMD assessment on brain MRI and genotyping were included in this analysis.

**Human Connectome Project (HCP)**

HCP12 is a major endeavor to map macroscopic human brain circuits and their relationship to behavior in a large population. It charts the neural pathways that underlie brain function and behavior, by acquiring and analyzing human brain connectivity from high-quality datasets serves as a key resource for the neuroscience research community, as it provides valuable resources for characterizing Human brain connectivity and function, their relationship to behavior, and their heritability and genetic underpinnings, which enables discoveries of how the brain is wired and how it functions in different individuals. HCP includes 981 subjects a part of twin subjects.

**i-Share Study**

The Internet-based Students HeAlth Research Enterprise (i-Share) study, a prospective population-based cohort of students in higher education institutions in France, is the largest ongoing epidemiological study conducted on students’ health. The aims of the i-Share study are to assess the students’ health and well-being, to study risk behaviors in this specific population, the frequency and consequences of various diseases, as well as, the pathophysiological mechanisms diseases affecting older persons which have a long preclinical phase and for which intermediate biomarkers could already be measured at a very young age. Students who were at least 18 years old, enrolled at a university or other higher education institution, and who are able to understand written French were eligible to participate on a voluntary basis via the i-Share website (http://www.i-share.fr/). Currently, over 20 000 participants have been included, of whom 1999 participants from the Bordeaux University site, who provided written informed consent, were enrolled in an ancillary study involving brain MRI (acquired on a Siemens 3T Prisma scanner) and genetic testing, including genome-wide genotyping on the Affymetrix Precision Medicine Axiom array (imputed on the HRC reference panel). Of these, 1745 participants had both high-quality brain MRI with PSMD assessment and genome-wide genotype data available, and were included in this analysis.

**Lothian Birth Cohort 1936 (LBC1936)**

The LBC1936 cohort consists of relatively healthy individuals assessed on cognitive and medical measures at age 70 years (n=1,091), and again with brain imaging traits at 73 years of age (n=866). They were born in 1936, most took part in the Scottish Mental Survey of 1947, and all lived independently in the Lothian region of Scotland. A full description of participant recruitment and testing can be found elsewhere.13,14  The study was approved by the Lothian (REC 07/MRE00/58) and Scottish Multicentre (MREC/01/0/56) Research Ethics Committees and all subjects gave written informed consent. A total of 569 participants with genotype data and PSMD measurement were included in this analysis.

**LIFE-Adult**

LIFE-Adult is a population-based study and a part of the large-scale research project (LIFE Leipzig Research Center for Civilization Diseases). 10,000 residents (main age range 40-79) from the destrict of Leipzig (Saxony, Germany) were recruited and extensively phenotyped for a number of disease and environmental parameters (see Loeffler et al.15 for a description of the assessment programme). All subjects gave written informed consent to participate in the study. The procedures were conducted according to the Declaration of Helsinki and approved by the University of Leipzig’s ethics committee (registration-number: 263-2009-14122009). A total of 1,440 participants with genotype data and PSMD measurement were included in this analysis.

**Older Australian Twins Study (OATS)**

Participants aged 65 years and over were recruited from the Australian Twin Registry and also through a recruitment drive. Inclusion criteria included an ability to consent, a co-twin who also consented to participate, completion of some education in English and residence in one of the three eastern states (Victoria, New South Wales, Queensland). Exclusion criteria included inadequate English to complete the assessment, current diagnosis of malignancy or other life-threatening medical illness and/or a current acute psychosis diagnosis. Written informed consent was obtained from all participants and the ethics committees of the Australian Twin Registry, University of New South Wales, University of Melbourne, Queensland Institute of Medical Research and the South Eastern Sydney and Illawarra Area Health Service. At baseline, there were 623 participants with a mean age of 70.77 years and 65.2% of the sample were women. For further details see Sachdev et al. (2009)16 and Sachdev et al. (2010).17 For the current study, there were 354 participants with whole genome sequencing data and PSMD assessment available for analysis.

**Pediatric Imaging, Neurocognition, and Genetics (PING)**

PING was launched in 2009 by the National Institute on Drug Abuse (NIDA) and Eunic Kennedy hriver National Institute Of Child Health & Human Development (NICHD) as a 2-year project of the American Recovery and Reinvestment Act. The primary goal of PING has been to create a data resource of highly standardized and carefully curated magnetic resonance imaging (MRI) data, comprehensive genotyping data, and developmental and neuropsychological assessments for a large cohort of developing children aged 3 to 20 years. The scientific aim of the project is, by openly sharing these data, to amplify the power and productivity of investigations of healthy and disordered development in children, and to increase understanding of the origins of variation in neurobehavioral phenotypes. For up-to-date information, see <http://ping.chd.ucsd.edu/>.

**Rhineland Study**

The Rhineland Study ([www.rheinland-studie.de](http://www.rheinland-studie.de))18,19 is an ongoing community-based prospective cohort study that invites inhabitants aged 30 years and above at baseline living in two geographically defined areas in the city of Bonn, Germany. Persons living in those areas were predominantly German with Caucasian ethnicity. The sole exclusion criterion is insufficient German language skills to provide informed consent. Approval to undertake the study was obtained from the ethics committee of the Medical Faculty of the University of Bonn. The study is carried out in accordance with the recommendations of the International Council for Harmonization (ICH) Good Clinical Practice (GCP) standards (ICH-GCP). Written informed consent was obtained from all participants in accordance with the Declaration of Helsinki. In this study, we included participants from the Rhineland Study aged 30 - 95 years with both genotype and MRI scans available that successfully passed dedicated genetics and MRI quality assurance workflows (n=2,383). We excluded participants with neurological disorders including stroke (n=123), leading to a sample of 2,260 participants (mean age: 54.29±14.06 years; 56.95% women).

**The Religious Orders Study (ROS) and the Rush Memory and Aging Project (MAP)**

The ROS, started in 1994, enrolled Catholic priests, nuns, and brothers; from about 40 groups in 12 states.20 The follow-up rate of survivors exceeds 90%. Participants were free of known dementia at enrolment, agreed to annual clinical evaluations, and signed both an informed consent and an Anatomic Gift Act form donating their brains at time of death. A more detailed description of the ROS has been published previously.21 As part of the annual evaluation, participants took a neuropsychological test battery.

The MAP, started in 1997, enrolled older men and women from assisted facilities in the Chicago area with no evidence on dementia baseline.21The follow-up rate of survivors exceeds 90%. Participants agreed to annual clinical evaluations, and signed both an informed consent and Anatomic Gift Act form donating their brains at time of death. A more detailed description of the ROS has been published previously.21 As part of the annual evaluation, participants took a neuropsychological test battery. Both studies have been approved by the institutional review board of RUSH University Medical Center. Written Informed consents were also obtained from each study participants. For the current study, there were 161 participants with genotyping data and PSMD assessment available for analysis.

**Rotterdam Study (RS)**

The Rotterdam Study is a population-based cohort study among inhabitants of a district of Rotterdam (Ommoord), The Netherlands, and aims to examine the determinants of disease and health in the elderly with a focus on neurogeriatric, cardiovascular, bone, and eye disease.22 In 1990-1993, 7,983 persons aged 55 years and older participated and were re-examined every 3 to 4 years (Rotterdam Study I). In 2000-2001 the cohort was expanded by 3,011 persons aged 55 and over who had not yet been part of the Rotterdam Study (Rotterdam Study II). In 2006-2008 a second expansion (Rotterdam Study III) of 3,932 persons aged 45 and over was realized. All participants had DNA extracted at their first visit. Genotyping was attempted in participants with high-quality extracted DNA in 2007-2008. In total, 6,291 samples from the Rotterdam Study I, 2,157 samples from Rotterdam Study II and 3,048 samples from Rotterdam Study III were available with good quality genotyping data. Genotyping was done at the Human Genotyping Facility, Genetic Laboratory Department of Internal Medicine, Erasmus MC, Rotterdam, the Netherlands. In 1995-1996, a random subset of non-demented persons from the Rotterdam Study I were randomly selected in strata of age and sex to undergo brain MRI.23 From 2005 onwards, brain MRI scanning was implemented in the core protocol of all Rotterdam Study cohorts. As a result, 961, 1,070 and 2,588 participants from respectively Rotterdam Study I, II and III had been scanned and genotyped and were available for these analyses.

**Sydney Memory and Ageing Study (MAS)**

The Sydney Memory and Ageing Study began in 2005 and is a longitudinal community-based study investigating mild cognitive impairment and the rate of cognitive change over time. Participants aged 70-90 years were randomly recruited from the compulsory electoral roll in Sydney, Australia. Exclusion criteria included limited English or a medical/psychological condition that would prevent them from completing assessments, dementia diagnosis, an age and education-adjusted MMSE score <24, psychotic symptoms, or a diagnosis of schizophrenia/bipolar disorder and/or a progressive malignancy. All participants provided informed written consent and the ethics committees of the University of New South Wales and the South Eastern Sydney and Illawarra Area Health Service approved the study. At baseline, 1037 participants were included with a mean age of 78.84 years and 44.8% were men. Further details are provided in Sachdev et al., (2010).24 For the current study, there were 539 participants free of stroke with genome-wide genotyping and PSMD assessment available for analysis.

**Saguenay Youth Study (SYS)**

The Saguenay Youth Study (SYS) is a two-generational study of adolescents and their parents (N=1,209 adolescents and 962 parents) aimed at investigating the etiology, early staged and trans-generational trajectories of common cardio-metabolic and brain diseases. The cohort was recruited from the genetic founder population of the Saguenay Lac St. Jean region of Quebec, Canada. The participants underwent extensive (15-hour) phenotyping, including an hour-long recording of beat by beat blood pressure, magnetic resonance imaging of the brain and a abdomen, and serum lipidomic profiling with LC-ESI_MS. All participants have been genome-wide genotyped (with ~8M imputed SNPs) and a subset of them (144 adolescent and their 288 parents) has been genome-wide epityped (whol blood DNA, Infinium HumanMethylation450k BeadChip). These assesssments are complemented by a detailed evaluation of each participant in a number of domains, including cognition, mental health and substance use, diet, physical activity and sleep, and family environment. The data collection took place during 2003-2012 in adolescents (full) and their parents (partial), and during 2012-2015 in parents (full). The research Ethics Committee of the Chicoutimi Hospital approved the study protocol. Written informed consent was also obtained from all the participants. For the current study, there were 374 participants free of stroke with genome-wide genotyping and PSMD assessment available for analysis.

**UK Biobank (UKB)**

UK Biobank is a prospective study that recruited 502,620 community-dwelling participants from across the United Kingdom between 2006 and 2010, aged 40 to 69 years (<http://www.ukbiobank.ac.uk>). The study collects extensive data from questionnaires, interviews, health records, physical measures, biological samples, and imaging. A subset of the participants also underwent brain MRI. Patients with a baseline diagnosis of stroke, multiple sclerosis, Parkinson disease, any other neurodegenerative problem (*International Classification of Diseases, Ninth Revision/Tenth Revision*, or self-report or health-record linkage) or no genetic data were excluded. UK Biobank received ethical approval from the research ethics committee (reference 11/NW/0382). All participants provided informed consent to participate. Procedures for brain imaging acquisition and initial quality check have been described previously and are available on the UK Biobank website (Brain Imaging Documentation V1.3; <http://www.ukbiobank.ac.uk>). In brief, all brain MRI data were acquired on a single standard Siemens Skyra 3T scanner (Siemens Medical Solutions, Germany) using the standard Siemens 32-channel radiofrequency receiver head coil. Totally, 31,291 stroke-free participants with GWAS data and PSMD assessment were included in this analysis. For whole-exome association studies, 29,938 stroke-free participants were included after quality control.

**Tohoku Medical Megabank (ToMMo)**

The Tohoku Medical Megabank (TMM) Project is composed of a population-based adult cohort study, the TMM Community-Based Cohort Study (TMM CommCohort Study) and a birth and three-generation cohort study, the TMM Birth and Three-Generation Cohort Study (TMM BirThree Cohort Study).25,26 The aim of the TMM CommCohort Study was to assess the long-term impact of the Great East Japan Earthquake (March 11, 2011) on disaster victims and gene-environment interactions on the incidence of multifactorial diseases, such as cancer and cardiovascular diseases.26

## Meta-analyses and related quality control

We performed ancestry-specific meta-analyses, followed by meta-analyses across ancestries. Ancestry was genetically inferred from genome-wide single nucleotide polymorphism markers using principal component analyses. Quantile-Quantile (QQ) plots of the P-values (observed versus expected) in the population based GWAS (discovery stage) are presented along with the genomic inflation factor (λ) (Supplementary Table 4), suggesting no systematic inflation of association statistics.

**UK Biobank**

See description of the study population above and of the quality control and the analyses performed in the Methods.

**BRIDGET**

The BRIDGET consortium was funded by the European Joint Programme for Neurodegenerative Diseases (JPND) to unravel genetic and epigenetic determinants of MRI-markers of brain aging. Five cohorts provided data for whole genome sequencing analyses: Graz Study (GSHA, N=128), i-Share study (N=550), Lothian Birth Cohort 1936 (LBC 1936, N=647), Sydney Memory and Aging Study (MAS, N=133), and Older Australian Twins Study (OATS, N=189). Details on each of these cohorts are provided above, except for GHSA, a population-based study on Health & Aging, which aims to identify core processes of aging and subsequently generate high-impact targets for the prevention and therapy of age-associated diseases. For all BRIDGET cohorts except LBC1936, whole genome sequencing data generated at >30X at McGill Genome Center. For LBC1936, whole genome sequencing data was generated on the Illumina X platform to a mean depth of 30X coverage and aligned to GRCh38 by Edinburgh Genomics at the University of Edinburgh.

***Harmonization of Read Alignments***

Whole genome sequencing data was analyzed for variants using the GenPipes30 DnaSeq pipeline which implements an adaptation of the GATK Best Practices.31,32,33,34 Reads were aligned to the human reference genome (build GRCh38) using the BWA-mem aligner.35 Mapped reads were further refined using GATK and Picard program suites33 (http://broadinstitute.github.io/picard) to improve mapping near insertions and deletions (indels; GATK IndelRealigner), to remove duplicate reads (Picard MarkDuplicates) and to improve quality scores (GATK BaseRecalibrator). Single Nucleotide Variants were called using GATK HaplotypeCaller in gvcf mode to allow efficient downstream merging of multiple samples into one variant file. All the samples within a cohort were combined using GATK CombineGVCFs, and finally genotyped usingGenotypeGVCFs.

***Quality control***

We then applied a quality control procedure to the WGS data. Possible DNA contamination of sequence data was assessed using verifyBamID36, on the set of known variants provided in dbSNP build142. A sample was considered contaminated and removed from the analysis when the FreeMix value > 3%. We additionally validated the reported sex of each sample using the inferred sex found with the function indexcov37 from goleft. All samples with discordant reported vs. infered sex status were removed from the analysis. After applying quality control filters, 1,647 participants with WGS and PSMD phenotype were available.

***Phenotype pooling strategy and single variant analyses***

Given the small sample size with WGS in each cohort, we ran a pooled association analysis by combining the data from all cohorts. MRI protocols were different in the participating cohorts, so a normalization of the MRI-based phenotypes was needed. We first used linear regression (using R v3.6.1) to regress PSMD with the covariates (age at MRI, sex, the first ten principal components of population stratification [PCs], ICV) separately in each cohort. Genetic PCs were generated using Plink 1.9 from a pruned subset of high-quality genetic markers (missingness<0.05, and MAF>0.05, LD-r² threshold of 0.2 with a window size of 1 000 and a step size of 100 markers). We then applied a rank-based inverse normal transformation (INT) to the residuals in each cohort (using the rntransform function from the GenABEL R package) before pooling. All associations were then tested using REGENIE27 and adjusted for age at MRI, sex, the first ten principal components of population stratification [PCs], ICV, and the cohort. In Regenie step 1, we used a slightly larger subset of pruned variants (missingness<0.05, and MAF>0.05, LD-r² threshold of 0.4 with a window size of 1 000 and a step size of 100 markers). In step 2 of REGENIE, we used all variants with minor allele count (MAC)>5 and tested them in association with PSMD using a linear mixed model as implemented in this software.

## Number of independent phenotypes calculation for multiple testing correction

We estimated the number of independent traits using correlations between traits in the i-share38 applying the Matrix Spectral Decomposition (matSpDlite)39 method (<http://neurogenetics.qimrberghofer.edu.au/matSpDlite/)> for vascular risk factors (8 independent phenotypes), other MRI-markers of cSVD (3 independent phenotypes), DTI-metrics (2 independent phenotypes). We considered 3 independent phenotypes for stroke (any stroke, ischemic stroke, ICH stroke), and one independent phenotype for AD.

## Validation and expansion of findings across the lifespan and across ancestries

We conducted sensitivity analyses using PSMD measures in ABCD (https://abcdstudy.org/)2 and the largest east Asian Japanese cohort Tohoko Mega Bank (ToMMO)25 We used the RVtest to perform the analyses. Analyses were adjusted for age, sex, intracranial volume, the first four principal components of population stratification in both cohorts.

## LD-score regression

We used LD-score regression40 (ldsc package <https://github.com/bulik/ldsc/>) to explore shared genetic variation with vascular and neurological phenotypes.

## Mendelian randomization

We used a Mendelian randomization approach to explore the causal relation of putative risk factors with PSMD, and of PSMD with neurological traits. The summary statistics were clumped using the 1000G imputed 3C-Dijon study data (r² threshold: 0.01, window size: 1 Mb and p-value threshold < 5x10-8) as it is recommended.41 With TwoSampleMR, we used the Steiger test to confirm the directionality.42

## Pathway analyses

First we used MAGMA gene set analyses,43 including 10,678 gene sets (curated gene sets: 4,761, GO terms: 5,917) from MsigDB v6.2, a p-value <3.8x10-5 correction for 1,320 independent gene sets was considered significant.

As a sensitivity analysis, we used the VEGAS2Pathway approach.44 VEGAS2Pathway accounted for gene density in LD blocks or correlated association p-values of neighboring genes, SNP density, and pathway size using a resampling strategy. The empirical significance threshold for VEGAS2Pathway was 1x10-5 accounting for 6,213 correlated pathways.

## GWAS catalog

We used GWAS catalog45 implemented in FUMA46 to identify other traits associated with the genome-wide significant risk loci for PSMD.

## Transcriptome-wide association studies

For transcriptome-wide association studies we used precomputed functional weights from 49 publicly available gene expression reference panels from diverse tissues (Genotype-Tissue Expression version 8 (GTEx v8)).47 Transcriptome-wide significant genes (eGenes) and the corresponding QTLs (eQTLs) were determined using Bonferroni correction, based on the average number of features (6140.5 genes) tested across all tissues48 and correcting for the three PSMD models tested (p-value <2.7x10-6).

## Cell type enrichment analysis

We performed a cell-type enrichment analysis with STEAP (**S**ingle cell **T**ype **E**nrichment **A**nalysis for **P**henotypes) which uses [S-LDSC](https://github.com/bulik/ldsc)49, [MAGMA](https://ctg.cncr.nl/software/magma)43, and [H-MAGMA](https://github.com/thewonlab/H-MAGMA)50 (Supplementary Table 24a). Expression specificity profiles were calculated using human and mouse single cell RNA-seq databases, including a human single cell atlas of fetal gene expression.51

## Lifetime brain gene expression profile

## To study lifetime expression of the genes identified in the GWAS analyses of WMH burden and PSMD, we used a public database <https://hbatlas.org/>. Donors were genotyped using an Illumina 2.5 million SNP chip, and transcriptome data was obtained using total RNA extracted with Illumina 2.5 million SNP chip, with stringent quality control criteria.52

# **ACKNOWLEDGEMENTS**

**1000BRAINS**

1000BRAINS is a population-based cohort based on the Heinz-Nixdorf Recall Study and is supported in part by the German National Cohort. We thank the Heinz Nixdorf Foundation (Germany) for their generous support in terms of the Heinz Nixdorf Study. The authors are supported by the Initiative and Networking Fund of the Helmholtz Association (Svenja Caspers) and the European Union’s Horizon 2020 Research and Innovation Programme under Grant Agreements 785907 (Human Brain Project SGA2; Svenja Caspers, Sven Cichon, and Katrin Amunts). This work was further supported by the German Federal Ministry of Education and Research (BMBF) through the Integrated Network IntegraMent (Integrated Understanding of Causes and Mechanisms in Mental Disorders) under the auspices of the e:Med Program (grant 01ZX1314A; Sven Cichon), and by the Swiss National Science Foundation (SNSF, grant 156791; Sven Cichon).

**ABCD**

Data used in the preparation of this article were obtained from the Adolescent Brain Cognitive DevelopmentSM (ABCD) Study ([https://abcdstudy.org](https://abcdstudy.org/)), held in the NIMH Data Archive (NDA). This is a multisite, longitudinal study designed to recruit more than 10,000 children age 9–10 and follow them over 10 years into early adulthood. The ABCD Study® is supported by the National Institutes of Health and additional federal partners under award numbers U01DA041048, U01DA050989, U01DA051016, U01DA041022, U01DA051018, U01DA051037, U01DA050987, U01DA041174, U01DA041106, U01DA041117, U01DA041028, U01DA041134, U01DA050988, U01DA051039, U01DA041156, U01DA041025, U01DA041120, U01DA051038, U01DA041148, U01DA041093, U01DA041089, U24DA041123, U24DA041147. A full list of supporters is available at <https://abcdstudy.org/federal-partners.html>. A listing of participating sites and a complete listing of the study investigators can be found at <https://abcdstudy.org/consortium_members/>. ABCD consortium investigators designed and implemented the study and/or provided data but did not necessarily participate in the analysis or writing of this report. This manuscript reflects the views of the authors and may not reflect the opinions or views of the NIH or ABCD consortium investigators. The ABCD data repository grows and changes over time. The ABCD data used in this report came from Data Release 3.0 (<http://dx.doi.org/10.15154/1519007>). All data were accessed via NIH data access request (DAR) number 17367 (University of Southern California)

**AGES**

Aging Gene-Environment Susceptibility-Reykjavik Study: The study was funded by the National Institute on Aging (NIA) (N01-AG-12100), Hjartavernd (the Icelandic Heart Association), and the Althingi (the Icelandic Parliament), with contributions from the Intramural Research Programs at the NIA and This work was supported by the Intramural Research Programs of the National Institute of Aging (ZIAAG007380), the National Eye Institute (ZIAEY000401), National Institute on Deafness and Other Communication Disorders (IAA Y2-DC-1004-02), and the National Heart, Lung, and Blood Institute (Z01 HL004607-08 CE). The study was approved by the Icelandic National Bioethics Committee (VSN: 00-063) and the MedStarResearch Institute (project 2003-145).

**ARIC**

The Atherosclerosis Risk in Communities study was performed as a collaborative study supported by National Heart, Lung, and Blood Institute (NHLBI) contracts (HHSN268201100005C, HSN268201100006C, HSN268201100007C, HHSN268201100008C, HHSN268201100009C, HHSN268201100010C, HHSN268201100011C, and HHSN268201100012C), R01HL70825, R01HL087641, R01HL59367, and R01HL086694; National Human Genome Research Institute contract U01HG004402; and National Institutes of Health (NIH) contract HHSN268200625226C. Infrastructure was partly supported by grant No. UL1RR025005, a component of the NIH and NIH Roadmap for Medical Research. This project was partially supported by National Institutes of Health R01 grants HL084099 and NS087541 to MF.

**ASPS-Fam**

The authors thank the staff and the participants for their valuable contributions. We thank Birgit Reinhart for her long-term administrative commitment, Elfi Hofer for the technical assistance at creating the DNA bank, Ing. Johann Semmler and Anita Harb for DNA sequencing and DNA analyses by TaqMan assays and Irmgard Poelzl for supervising the quality management processes after ISO9001 at the biobanking and DNA analyses.

The Medical University of Graz and the Steiermärkische Krankenanstaltengesellschaft support the databank of the ASPS/ASPS-Fam. The research reported in this article was funded by the Austrian Science Fund (FWF) grant numbers PI904, P20545-P05 and P13180 and supported by the Austrian National Bank Anniversary Fund, P15435 and the Austrian Ministry of Science under the aegis of the EU Joint Programme-Neurodegenerative Disease Research (JPND)-www.jpnd.eu.

**BIL & GIN**

BIL&GIN was funded by the French National Research Agency (ANR, grant no. 15-HBPR-0001-03), as part of the FLAG-ERA consortium project “MULTI-LATERAL”, a Partner Project to the European Union’s Flagship Human Brain Project.

**CARDIA**

The CARDIA Study is conducted and supported by the National Heart, Lung, and Blood Institute in collaboration with the University of Alabama at Birmingham (HHSN268201300025C & HHSN268201300026C), Northwestern University (HHSN268201300027C), University of Minnesota (HHSN268201300028C), Kaiser Foundation Research Institute (HHSN268201300029C), and Johns Hopkins University School of Medicine (HHSN268200900041C). CARDIA is also partially supported by the Intramural Research Program of the National Institute on Aging. Genotyping was funded as part of the NHLBI Candidate-gene Association Resource (N01-HC-65226) and the NHGRI Gene Environment Association Studies (GENEVA) (U01-HG004729, U01-HG04424, and U01-HG004446).

**FHS**

This work was supported by the National Heart, Lung and Blood Institute’s Framingham Heart Study (Contract No. N01-HC-25195, No. HHSN268201500001I and No. 75N92019D00031). This study was also supported by grants from the National Institute of Aging (R01s AG031287, AG054076, AG049607, AG059421, AG059725, U01s AG049505, AG052409, P30 AG066546 and R01 AG059421, R01 NS017950, R01 AG054076, R01 AG049607), the National Institute of Neurological Disorders and Stroke (R01 NS017950). Funding for SHARe Affymetrix genotyping was provided by NHLBI Contract N02-HL64278. The computational work reported in this paper was performed on the Shared Computing Cluster which is administered by Boston University’s Research Computing Services. We also thank all the FHS study participants.

**HCP**

HCP data were provided by the Human Connectome Project, WU-Minn Consortium (Principal Investigators: David Van Essen and Kamil Ugurbil; 1U54MH091657) funded by the 16 NIH Institutes and Centers that support the NIH Blueprint for Neuroscience Research; and by the McDonnell Center for Systems Neuroscience at Washington University. All genetic data for HCP was accessed dbGAP request #133035-1 for the dataset General Research Use (IRB, PUB) in Mapping the Human Connectome: Structure, Function, and Heritability access as part of the project titled #37739: "Multisite Neuroimaging Genetics" (Jahanshad).

**i-Share**

The Internet based Students HeAlth Research Enterprise (i-Share) study is conducted by the Universities of Bordeaux and Versailles Saint-Quentin-en-Yvelines (France). The i-Share study has received funding by the French National Agency (Agence Nationale de la Recherche, ANR), via the Investment for the Future programme (grand number ANR-10-COHO-05 and ANR-18-RHUS-0002. ) and from the University of Bordeaux Initiative of Exellence (IdEX). This project has also received funding from the European Research Council (ERC) under the European Union's Horizon 2020 research and innovation programme under grant agreement No 640643.

**LBC1936**

We thank the LBC1936 cohort members and research staff involved in data collection, processing and preparation. The LBC1936 is supported by Age UK (Disconnected Mind program grant). The work was undertaken by The University of Edinburgh Centre for Cognitive Ageing and Cognitive Epidemiology, part of the cross council Lifelong Health and Wellbeing Initiative (MR/K026992/1). The brain imaging was performed in the Brain Research Imaging Centre (www.bric.ed.ac.uk) a center in the SINAPSE Collaboration (www.sinapse.ac.uk) supported by the Scottish Funding Council and Chief Scientist Office. Funding from the UK Biotechnology and Biological Sciences Research Council (BBSRC) and the UK Medical Research Council (MRC) is gratefully acknowledged. Genotyping was supported by a grant from the BBSRC (Ref. BB/F019394/1).

Whole genome sequencing was funded through an institutional award to the Roslin Institute from the BBSRC with a grant code BBS/E/D/10002071.

**LIFE-Adult**

LIFE-Adult is funded by the Leipzig Research Center for Civilization Diseases (LIFE). LIFE is an organizational unit affiliated to the Medical Faculty of the University of Leipzig. LIFE is funded by means of the European Union, by the European Regional Development Fund (ERDF) and by funds of the Free State of Saxony within the framework of the excellence initiative. This work was also funded by the Deutsche Forschungsgemeinschaft (Grant Number: CRC 1052 “Obesity mechanisms” project A1 to AV) and by the Max Planck Society.

**OATS**

The OATS study has been funded by a National Health & Medical Research Council (NHMRC) and Australian Research Council (ARC) Strategic Award Grant of the Ageing Well, Ageing Productively Program (ID No. 401162); NHMRC Project (seed) Grants (ID No. 1024224 and 1025243); NHMRC Project Grants (ID No. 1045325 and 1085606); and NHMRC Program Grants (ID No. 568969 and 1093083). Collection of WGS data was supported by the NHMRC National Institute for Dementia Research Grants APP1115575 and APP1115462. This research was facilitated through access to Twins Research Australia, a national resource supported by a Centre of Research Excellence Grant (ID No. 1079102) from the National Health and Medical Research Council. We thank the participants for their time and generosity in contributing to this research. We acknowledge the contribution of the OATS research team (https://cheba.unsw.edu.au/project/older-australian-twins-study) to this study.

**PING**

The Pediatric Imaging, Neurocognition and Genetics Study (PING) dataset used in the preparation of this manuscript were obtained from the National Institute of Mental Health (NIMH) Data Archive (NDA) and accessed via NIH data access request (DAR) number 19654. NDA is a collaborative informatics system created by the National Institutes of Health to provide a national resource to support and accelerate research in mental health. Dataset identifier(s): NIMH Data Archive Collection ID 2607. This manuscript reflects the views of the authors and may not reflect the opinions or views of the NIH or of the Submitters submitting original data to NDA.

**Rhineland study**

The Rhineland Study is supported by the German Center for Neurodegenerative Diseases (DZNE). The genomic analyses were supported in part by the Federal Ministry of Education and Research under the Diet-Body-Brain Competence Cluster in Nutrition Research (grant number 01EA1410C) and grant (FKZ: 01KX2230) with the title "PreBeDem - Mit Prävention und Behandlung gegen Demenz”, the Deutsche Forschungsgemeinschaft (DFG, German Research Foundation) under Germany´s Excellence Strategy – EXC 2151 – 390873048, the Deutsche Forschungsgemeinschaft (DFG, German Research Foundation) – SFB 1454 – Project-ID 432325352, and the Helmholtz Association under the 2023 and 2024 Innovation Pool.

**Rotterdam Study**

The Rotterdam Study is funded by Erasmus Medical Center and Erasmus University, Rotterdam, Netherlands Organization for the Health Research and Development (ZonMw), the Research Institute for Diseases in the Elderly (RIDE), the Ministry of Education, Culture and Science, the Ministry for Health, Welfare and Sports, the European Commission (DG XII), and the Municipality of Rotterdam. The authors are grateful to the study participants, the staff from the Rotterdam Study and the participating general practitioners and pharmacists. The generation and management of GWAS genotype data for the Rotterdam Study (RS I, RS II, RS III) were executed by the Human Genotyping Facility of the Genetic Laboratory of the Department of Internal Medicine, Erasmus MC, Rotterdam, The Netherlands. The GWAS datasets are supported by the Netherlands Organisation of Scientific Research NWO Investments (nr. 175.010.2005.011, 911-03-012), the Genetic Laboratory of the Department of Internal Medicine, Erasmus MC, the Research Institute for Diseases in the Elderly (014-93-015; RIDE2), the Netherlands Genomics Initiative (NGI)/Netherlands Organisation for Scientific Research (NWO) Netherlands Consortium for Healthy Aging (NCHA), project nr. 050-060-810. We thank Pascal Arp, Mila Jhamai, Marijn Verkerk, Lizbeth Herrera and Marjolein Peters, and Carolina Medina-Gomez, for their help in creating the GWAS database, and Karol Estrada, Yurii Aulchenko, and Carolina Medina-Gomez, for the creation and analysis of imputed data. HHHA is supported by ZonMW grant number 916.19.151.

**ROSMAP**

The ROSMAP is supported by P30AG10161, P30AG72975, R01AG15819, R01AG17917, U01AG46152, and U01AG61356.

**Sydney MAS**

The Sydney Memory and Ageing Study has been funded by three National Health & Medical Research Council (NHMRC) Program Grants (ID No. ID350833, ID568969, and APP1093083). Collection of WGS data was supported by the NHMRC National Institute for Dementia Research Grants APP1115575 and APP1115462. We thank the participants and their informants for their time and generosity in contributing to this research. We also acknowledge the MAS research team: <https://cheba.unsw.edu.au/research-projects/sydney-memory-and-ageing-study>.

**SYS**

The Saguenay Youth Study has been funded by the Canadian Institutes of Health Research (TP, ZP), Heart and Stroke Foundation of Canada (ZP), and the Canadian Foundation for Innovation (ZP). We thank all families who took part in the Saguenay Youth Study. SYS is supported by the Canadian Institutes of Health Research: NET54015, NRF86678, TMH109788.

**The Nagahama Study**

In this study the Nagahama genomic data was used to generate a linkage disequilibrium reference panel, in order to compute a genetic risk score for PSMD applicable to an East-Asian ancestry population. We are grateful to the Nagahama City Office and nonprofit organization Zeroji Club for their help in conducting the study. This project is supported by operational funds of Kyoto University and the Top Global University Project of the Ministry of Education, Culture, Sports, Science and Technology (MEXT) in Japan. We also received a Grant-in-Aid for Scientific Research from the Japan Society for the Promotion of Science, research grants from the Japan Agency for Medical Research and Development for the Practical Research Project for Rare/Intractable Diseases, and the Comprehensive Research on Aging and Health Science for Dementia R&D.

**Tohoku Medical Megabank (ToMMo)**

Tohoku Medical MEGABANK (TMM) has been supported in part by MEXT-JST and AMED; most recent grant numbers are JP20km0105001, JP20km0105002, JP20km0105003 and JP20km0105004

**UKB**

This research has been conducted using the UK Biobank Access Approve 18545. The UK Biobank imaging project is funded by the Medical Research Council (MRC) and the Wellcome Trust. We would like to thank the UK Biobank volunteers who contributed their data and UK Biobank imaging Center staff.

**McGill Genome Center**

Work done at the Canadian Center for Computational Genomics was supported by Genome Canada. Data analyses were enabled by compute and storage resources provided by Compute Canada and Calcul Québec. GB is supported by the Fonds de Recherche Santé Québec and the Canada Research Chair program.

# **REFERENCES**

1. Caspers, S. *et al.* Studying variability in human brain aging in a population-based German cohort-rationale and design of 1000BRAINS. *Front Aging Neurosci* **6**, 149 (2014).

2. Casey, B. J. *et al.* The Adolescent Brain Cognitive Development (ABCD) study: Imaging acquisition across 21 sites. *Dev Cogn Neurosci* **32**, 43–54 (2018).

3. Harris, T. B. *et al.* Age, Gene/Environment Susceptibility-Reykjavik Study: multidisciplinary applied phenomics. *Am J Epidemiol* **165**, 1076–1087 (2007).

4. Schmidt, R. *et al.* Assessment of cerebrovascular risk profiles in healthy persons: definition of research goals and the Austrian Stroke Prevention Study (ASPS). *Neuroepidemiology* **13**, 308–313 (1994).

5. Schmidt, R., Fazekas, F., Kapeller, P., Schmidt, H. & Hartung, H. P. MRI white matter hyperintensities: three-year follow-up of the Austrian Stroke Prevention Study. *Neurology* **53**, 132–139 (1999).

6. The Atherosclerosis Risk in Communities (ARIC) Study: design and objectives. The ARIC investigators. *Am J Epidemiol* **129**, 687–702 (1989).

7. Mazoyer, B. *et al.* BIL&GIN: A neuroimaging, cognitive, behavioral, and genetic database for the study of human brain lateralization. *Neuroimage* **124**, 1225–1231 (2016).

8. Friedman, G. D. *et al.* CARDIA: study design, recruitment, and some characteristics of the examined subjects. *J Clin Epidemiol* **41**, 1105–1116 (1988).

9. Dawber, T. R. & Kannel, W. B. The Framingham study. An epidemiological approach to coronary heart disease. *Circulation* **34**, 553–555 (1966).

10. Feinleib, M., Kannel, W. B., Garrison, R. J., McNamara, P. M. & Castelli, W. P. The Framingham Offspring Study. Design and preliminary data. *Prev Med* **4**, 518–525 (1975).

11. Splansky, G. L. *et al.* The Third Generation Cohort of the National Heart, Lung, and Blood Institute’s Framingham Heart Study: design, recruitment, and initial examination. *Am J Epidemiol* **165**, 1328–1335 (2007).

12. Kochunov, P. *et al.* Heritability of fractional anisotropy in human white matter: a comparison of Human Connectome Project and ENIGMA-DTI data. *Neuroimage* **111**, 300–311 (2015).

13. Wardlaw, J. M. *et al.* Brain aging, cognition in youth and old age and vascular disease in the Lothian Birth Cohort 1936: rationale, design and methodology of the imaging protocol. *Int J Stroke* **6**, 547–559 (2011).

14. Deary, I. J. *et al.* The Lothian Birth Cohort 1936: a study to examine influences on cognitive ageing from age 11 to age 70 and beyond. *BMC Geriatr* **7**, 28 (2007).

15. Loeffler, M. *et al.* The LIFE-Adult-Study: objectives and design of a population-based cohort study with 10,000 deeply phenotyped adults in Germany. *BMC Public Health* **15**, 691 (2015).

16. Sachdev, P. S. *et al.* A comprehensive neuropsychiatric study of elderly twins: the Older Australian Twins Study. *Twin Res Hum Genet* **12**, 573–582 (2009).

17. Sachdev, P. S. *et al.* Cognitive functioning in older twins: the Older Australian Twins Study. *Australas J Ageing* **30 Suppl 2**, 17–23 (2011).

18. Lohner, V., Enkirch, S. J., Hattingen, E., Stöcker, T. & Breteler, M. M. B. Safety of Tattoos, Permanent Make-Up, and Medical Implants in Population-Based 3T Magnetic Resonance Brain Imaging: The Rhineland Study. *Front Neurol* **13**, 795573 (2022).

19. Tobisch, A. *et al.* Compressed Sensing Diffusion Spectrum Imaging for Accelerated Diffusion Microstructure MRI in Long-Term Population Imaging. *Front Neurosci* **12**, 650 (2018).

20. Bennett, D. A., Schneider, J. A., Arvanitakis, Z. & Wilson, R. S. Overview and findings from the religious orders study. *Curr Alzheimer Res* **9**, 628–645 (2012).

21. Bennett, D. A. *et al.* Overview and findings from the rush Memory and Aging Project. *Curr Alzheimer Res* **9**, 646–663 (2012).

22. Ikram, M. A. *et al.* Objectives, design and main findings until 2020 from the Rotterdam Study. *Eur J Epidemiol* **35**, 483–517 (2020).

23. Ikram, M. A. *et al.* The Rotterdam Scan Study: design update 2016 and main findings. *Eur J Epidemiol* **30**, 1299–1315 (2015).

24. Sachdev, P. S. *et al.* The Sydney Memory and Ageing Study (MAS): methodology and baseline medical and neuropsychiatric characteristics of an elderly epidemiological non-demented cohort of Australians aged 70-90 years. *Int Psychogeriatr* **22**, 1248–1264 (2010).

25. Kuriyama, S. *et al.* Cohort Profile: Tohoku Medical Megabank Project Birth and Three-Generation Cohort Study (TMM BirThree Cohort Study): rationale, progress and perspective. *Int J Epidemiol* **49**, 18–19m (2020).

26. Hozawa, A. *et al.* Study Profile of the Tohoku Medical Megabank Community-Based Cohort Study. *J Epidemiol* **31**, 65–76 (2021).

27. Mbatchou, J. *et al.* Computationally efficient whole-genome regression for quantitative and binary traits. *Nat Genet* **53**, 1097–1103 (2021).

28. Willer, C. J., Li, Y. & Abecasis, G. R. METAL: fast and efficient meta-analysis of genomewide association scans. *Bioinformatics* **26**, 2190–2191 (2010).

29. Cingolani, P. *et al.* A program for annotating and predicting the effects of single nucleotide polymorphisms, SnpEff: SNPs in the genome of Drosophila melanogaster strain w1118; iso-2; iso-3. *Fly (Austin)* **6**, 80–92 (2012).

30. Bourgey, M. *et al.* GenPipes: an open-source framework for distributed and scalable genomic analyses. *Gigascience* **8**, giz037 (2019).

31. Van der Auwera, G. A. *et al.* From FastQ data to high confidence variant calls: the Genome Analysis Toolkit best practices pipeline. *Curr Protoc Bioinformatics* **43**, 11.10.1-11.10.33 (2013).

32. DePristo, M. A. *et al.* A framework for variation discovery and genotyping using next-generation DNA sequencing data. *Nat Genet* **43**, 491–498 (2011).

33. McKenna, A. *et al.* The Genome Analysis Toolkit: a MapReduce framework for analyzing next-generation DNA sequencing data. *Genome Res* **20**, 1297–1303 (2010).

34. Poplin, R. *et al.* Scaling accurate genetic variant discovery to tens of thousands of samples. Preprint at https://doi.org/10.1101/201178 (2017).

35. Li, H. & Durbin, R. Fast and accurate long-read alignment with Burrows-Wheeler transform. *Bioinformatics* **26**, 589–595 (2010).

36. Jun, G. *et al.* Detecting and estimating contamination of human DNA samples in sequencing and array-based genotype data. *Am J Hum Genet* **91**, 839–848 (2012).

37. Pedersen, B. S., Collins, R. L., Talkowski, M. E. & Quinlan, A. R. Indexcov: fast coverage quality control for whole-genome sequencing. *Gigascience* **6**, 1–6 (2017).

38. Montagni, I., Guichard, E. & Kurth, T. Association of screen time with self-perceived attention problems and hyperactivity levels in French students: a cross-sectional study. *BMJ Open* **6**, e009089 (2016).

39. Li, J. & Ji, L. Adjusting multiple testing in multilocus analyses using the eigenvalues of a correlation matrix. *Heredity (Edinb)* **95**, 221–227 (2005).

40. Bulik-Sullivan, B. K. *et al.* LD Score regression distinguishes confounding from polygenicity in genome-wide association studies. *Nat Genet* **47**, 291–295 (2015).

41. Swerdlow, D. I. *et al.* Selecting instruments for Mendelian randomization in the wake of genome-wide association studies. *Int J Epidemiol* **45**, 1600–1616 (2016).

42. Hemani, G., Tilling, K. & Davey Smith, G. Orienting the causal relationship between imprecisely measured traits using GWAS summary data. *PLoS Genet* **13**, e1007081 (2017).

43. de Leeuw, C. A., Mooij, J. M., Heskes, T. & Posthuma, D. MAGMA: generalized gene-set analysis of GWAS data. *PLoS Comput Biol* **11**, e1004219 (2015).

44. Mishra, A. & MacGregor, S. A Novel Approach for Pathway Analysis of GWAS Data Highlights Role of BMP Signaling and Muscle Cell Differentiation in Colorectal Cancer Susceptibility. *Twin Res Hum Genet* **20**, 1–9 (2017).

45. Buniello, A. *et al.* The NHGRI-EBI GWAS Catalog of published genome-wide association studies, targeted arrays and summary statistics 2019. *Nucleic Acids Res* **47**, D1005–D1012 (2019).

46. Watanabe, K., Taskesen, E., van Bochoven, A. & Posthuma, D. Functional mapping and annotation of genetic associations with FUMA. *Nat Commun* **8**, 1826 (2017).

47. GTEx Consortium. The Genotype-Tissue Expression (GTEx) project. *Nat Genet* **45**, 580–585 (2013).

48. Gusev, A. *et al.* Integrative approaches for large-scale transcriptome-wide association studies. *Nat Genet* **48**, 245–252 (2016).

49. Finucane, H. K. *et al.* Partitioning heritability by functional annotation using genome-wide association summary statistics. *Nat Genet* **47**, 1228–1235 (2015).

50. Sey, N. Y. A. *et al.* A computational tool (H-MAGMA) for improved prediction of brain-disorder risk genes by incorporating brain chromatin interaction profiles. *Nat Neurosci* **23**, 583–593 (2020).

51. Cao, J. *et al.* A human cell atlas of fetal gene expression. *Science* **370**, eaba7721 (2020).

52. Kang, H. J. *et al.* Spatio-temporal transcriptome of the human brain. *Nature* **478**, 483–489 (2011).
