# Supplementary material for: Genomics of diffusion-imaging integrating GWAS, exome data and single-cell sequencing unravels lifespan determinants of cerebral small vessel disease
Source: Research Square preprint supplement (doi:10.21203/rs.3.rs-5926137/v1), 2025-02-14
Supplement: Supplementary file 2 [file a727b7807d56f43d3df00916.xlsx]

## Sheet: List_of_Suppl_Tables
List of Supplementary Tables
Supplementary Table 1. Study design and sample characteristics of the individual studies
Supplementary Table 2. GWAS genotyping platforms, imputation panels and quality control of genotypes
Supplementary Table 3. Image acquisition and processing
Supplementary Table 4. Genomic inflation factor (λ, lambda) for individual studies and meta-analyses
Supplementary Table 5. European ancestry inverse variance weighted (IVW) meta-analysis of GWAS for Peak width of Skeletonized Mean Diffusivity (PSMD)
Supplementary Table 6. Association of genome-wide significant Peak Width of Skeletonized Mean Diffusivity (PSMD) loci without TIV adjustment
Supplementary Table 7. Conditional and joint multiple-SNP analysis of PSMD GWAS summary statistics (GCTA-cojo)
Supplementary Table 8. Genetics variants associated with PSMD (5x10-8<p-value<5x10-6) in the cross-ancestry meta-analysis
Supplementary Table 9. Loci reaching GW significance in the multiancestry meta-analysis using MR-MEGA
Supplementary Table 10. Association of genome-wide significant PSMD risk loci withPSMD across the lifespan and across ancestries
Supplementary Table 11. Fine-mapping results in European ancestry participants
Supplementary Table 12. Extraction of protein quantitative trait loci from Ferkingstad et al. for two credible SNPs (rs12521212 and rs7728421) at chr5q23.2 and two credible SNPs (rs62434144 and rs275350) at 6q25.1
Supplementary Table 13. Multi-trait analysis of genome-wide association summary statistics of PSMD and white matter hyperintensity volume (WMH)
Supplementary table 14. Gene-based tests in European GWAS meta-analysis using MAGMA & VEGAS2 software
Supplementary Table 15. Suggestive associations of genetic loci with Peak Width of Skeletonized Mean Diffusivity (PSMD) in European-ancestry participants, at 5x10-8<p<5x10-6
Supplementary Table 16. Whole exome associated Peak width of Skeletonized Mean Diffusivity (PSMD) single variant risk loci
Supplementary Table 17. Gene-based associations with Peak width of Skeletonized Mean Diffusivity (PSMD)
Supplementary Table 18. Shared genetic contribution across PSMD GWAS model - LD-score regression (LDSC, among European-ancestry participants)
Supplementary Table 19. Association of PSMD risk variants with PSMD in children (ABCD study, N=3,769)
Supplementary Table 20. Association of known WMH risk variants and PSMD across age strata
Supplementary Table 21. Shared genetic contribution between peak width of skeletonized mean diffusivity (PSMD) and other traits
Supplementary Table 22. Association of PSMD genome-wide significant genetic variants with other published traits (GWAS catalog)
Supplementary Table 23. LD score regression (LDSR) estimates on the genome-wide genetic correlation between Peak wisth of Skeletonized Mean Diffusivity (PSMD) and related vascular, and neurological diseases
Supplementary Table 24. After exclusion of overlapping samples - Mendelian randomization analysis between putative risk factors and PSMD and between PSMD and neurological traits, using GSMR, and TwoSampleMR
Supplementary Table 25. Pathway analysis using MAGMA software
Supplementary Table 26. Pathway analysis using VEGAS software for gene-based burden results from the whole exome sequencing analysis
Supplementary Table 27. Transcriptome wide association statistics (TWAS) of Peak Width of Skeletonized Mean Diffusivity (PSMD) with gene expression from related tissue types
Supplementary Table 28. Proteome-wide association statistics (PWAS) for Peak Width of Skeletonized Mean Diffusivity (PSMD) with protein levels in the dorsolateral prefrontal cortex (DLPFC)
Supplementary Table 29. RNA-seq datasets used in the Single cell Type Enrichment Analysis for Phenotypes (STEAP) pipeline
Supplementary Table 30. Cell-type enrichment analyses
Supplementary Table 31. prioritizing drug targets for enhanced drug discovery

## Sheet: Suppl. Table-1
Supplementary Table 1. Study design and sample characteristics of the individual studies
Study	Sample with MRI & genotype data, N	Sample excluded for stroke, N	Sample excluded for other pathologies, N *	Sample used in analyses, N					Age at MRI (years)	Age range	Women	PSMD 10-4 (mm2/s)	ICV volume (cm3)	Covariates used	GWAS software used	IRB Institution/Committee
				Full model	Age 9-11	Age 18-35	Age 35-65	Age > 65	mean ± SD	min-max	N (%)	mean ± SD	mean ± SD
1000BRAINS	814	0	0	814			334	480	67.42 ± 6.77	53-85	361 (44.35)	3.091 ± 0.48	1482.25 ± 138.21	Age , sex, PC1-10	EPACTS v3.2.6-patched	ethics committee of the University of Duisburg-Essen
ABCD-EA	3769	0	0		3769				9.96 ± 0.63	8.92 - 11	1662 (43.89)	7.72 ± 0.24	1561.67 ± 141.42	Age, Sex, ICV, C1, C2, C3, C4	rvtest	ethics committe of the University of California, San Diego
AGES	2875	199	36	2602				2602	76.41 ± 5.34	67-96	1524 (57.73)	3.72 ± 0.82	1496.03 ± 146.54	Age, sex, ICV, genotyping platform, PC1-5	PLINK	Icelandic National Bioethics Committee (VSN: 00-063) and the MedStarResearch Institute (project 2003-145)
ARIC - AA	400	21	2	377				377	75.27 ± 5.06	67-88	254 (67.37)	3.31 ± 0.80	1309.06 ± 136.40	Age, sex, ICV, study site, PC1-4	ProbABEL	ARIC Publications Committee and the ARIC Coordinating Center
ARIC - EA	1122	19	295	808				808	77.11 ± 5.32	67-90	480 (59.41)	3.57 ± 0.75	1401.26 ± 151.21	Age, sex, ICV, study site, PC1-2	ProbABEL	ARIC Publications Committee and the ARIC Coordinating Center
ASPS-FAM	249	0	0	249			86	163	66.20 ± 11.0	38-87	141 (56.63)	3.1 ± 0.5	1475.1 ± 145.2	Age,sex, ICV,PC1-4	rvtest	Ethics committee of the Medical University of Graz
BIL & GIN	260	0	0	260		241			25.24 ± 5.58	18-46	133 (51.15)	2.13 ± 0.18	1423.19 ± 141.15	Age, sex, ICV	plink 1.9	BIL&GIN study was approved by the local ethics committee (CCPRB Basse-Normandie)
CARDIA - AA	145	1	0	144			144		49.40 ± 3.85	43-59	84 (58.33)	2.58 ± 0.39	1297.95 ± 143.39	Age, sex, ICV, study site, PC1-4	ProbABEL	all relevant institutional review boards for human use
CARDIA - EA	364	2	0	362			362		51.28 ± 3.41	42-61	193 (53.31)	2.56 ± 0.31	1404.37 ± 142.94	Age, sex, ICV, study site, PC1-2	ProbABEL	all relevant institutional review boards for human use
FHS	2987	30	70	2887		146	1878	863	56.84 ± 13.95	26-94	1544 (53.48)	2.41 ± 0.50	11254.98 ± 126.86	Age, sex, ICV, PC5	GWAF	Institutional Review Board of Boston University Medical Center
HCP-EA	337	0	0	337		337			29.03 ± 3.45	22-35	269 (54.56)	7.30 ± 0.20	1610.38 ± 171.89	Age, Sex, ICV, C1, C2, C3, C4	rvtest	Washington University in St. Louis's Human Research Protection Office (HRPO).
i-Share	1778	0	23	1745		1745			22.11 ± 2.29		1246 (72.02)	1.59 ± 0.14		Age, sex, ICV, first four PCs	ProbABEL	Commission Nationale Informatique et Libertés (CNIL); CCTIRS (Comité Consultatif sur le Traitement de l’Information en matière de Recherche dans le domaine de la Santé); CPP (Comité de Protection des Personnes); l'Agence Nationale de Sécurité du Médicament et Hors Produit de Santé (ANSM)
LBC1936	612	42	1	569				569	72.70 ± 0.70	70-74	265 (46.57)	3.16 ± 0.51	1453.43 ± 143.93	Age at MRI, sex, ICV, first 3 PCs	plink2.0	Lothian (REC 07/MRE00/58) and Scottish Multicentre (MREC/01/0/56) Research Ethics Committees
LIFE-Adult	1435	NA	NA	1434		190	666	578	56.73 ± 15.66	20-79	779 (54.29)	2.45 ± 0.46	1462.73 ± 143.22	Age, sex, ICV	plink 1.9	University of Leipzig’s ethics committee
OATS	354	13	0	341				341	71.01 ± 4.96	65-88	219 (64.22)	3.12 ± 0.70	1450.05 ± 168.31	Age, sex, ICV, scannerSite (as factor)	ProbABEL	Ethical committees of the Australian Twin Registry, the University of New South Wales, the University of Melbourne, the Queensland Institute of Medical Research, and the South-Eastern Sydney and Illawarra Area Health Service
PING-EA	489	0	0	489		489			14.46 ± 4.62	3.17-21	400 (47.28)	7.62 ± 0.40	1416.40 ± 213.97	Age, sex,ICV, C1, C2, C3, C4	rvtest	Institutional Review Board (IRB) at the University of California, San Diego (UCSD)
Rhineland Study	2383	102	21	2220		263	1442	515	54.29 ± 14.06	30-95	1287 (56.95)	2.89 ± 0.44	1548.84 ± 151.27	Age, Sex, ICV		ethics committee of the Medical Faculty of the University of Bonn
ROSMAP	161	0	0	160				160	84.95 ± 6.57	64-98	69 (42.86)	3.92 ± 1.05	1411.60 ± 141.10	Age, sex, PC1-4	rvtest	institutional review board of RUSH University Medical Center
RSI	961	45	3	913				909	79.3 ± 4.6	72-100	545 (58.055)	3.11 ± 0.53	1128.40 ±117.70	Age, sex, ICV, PC1-4	Quicktest	The Rotterdam Study is approved by a special permit issued by the Ministry of Health, Welfare, and Sport of The Netherlands (under Article 3 of the Population Screening Act (the WBO, in Dutch))
RSII	1070	43	3	1024				973	71.5 ± 5.3	63-97	539 (52.64)	2.72 ± 0.46	1138.30 ± 115.10	Age, sex, ICV, PC1-4	Quicktest	The Rotterdam Study is approved by a special permit issued by the Ministry of Health, Welfare, and Sport of The Netherlands (under Article 3 of the Population Screening Act (the WBO, in Dutch))
RSIII	2558	53	2	2503			2299	204	57.21 ± 6.50	45-89	1393 (55.65)	2.26± 0.34	1148.40 ± 115.50	Age, sex, ICV, PC1-4	Quicktest	The Rotterdam Study is approved by a special permit issued by the Ministry of Health, Welfare, and Sport of The Netherlands (under Article 3 of the Population Screening Act (the WBO, in Dutch))
Sydney MAS	396	14	8	374				374	80.34 ± 4.65	72-93	201 (53.74)	4.09 ± 0.72	1357.98 ± 177.24	Age, sex, ICV, scanner	ProbABEL	Commission Nationale Informatique et Libertés (CNIL); CCTIRS (Comité Consultatif sur le Traitement de l’Information en matière de Recherche dans le domaine de la Santé); CPP (Comité de Protection des Personnes); l'Agence Nationale de Sécurité du Médicament et Hors Produit de Santé (ANSM)
SYS	563	0	0	539			539		49.42 ± 4.89	36-63	312(55.42)	2.74 ± 0.25	1492.88 ± 195.62	Age, sex	Quicktest	Ethics Committee of the Chicoutimi Hospital
ToMMo-AS	5961	0	0	5961		858	3015	2088	55.6±15.1	21-87	1299 (62.2)	2.82 ± 0.48	1390 ± 12.8	age, sex, TIV, and PC1 to 10	BOLT-LMM v2.3.4	Tohoku University Institutional Review Board (IRB)
UKBB	31291	0	0	31291			16176	15115	64.13 ± 0.51	45.1-81.8	16612 (53.1)	2.39 ± 0.51	1441.68 ± 138.94	age, sex, TIV, and PC1 to 10	BOLT-LMM	National Research Ethics Service Committee North West-Haydock (reference 11/NW/0382)
* Pathologies that may influence PSMD measurement

## Sheet: Suppl. Table-2
Supplementary Table 2. GWAS genotyping platforms, imputation panels and quality control of genotypes
Study	Genotyping platforms - SNP panel	Genotyping center	Genotype calling algorithm	Sample call rate	SNP call rate	MAF	HWE p-value	Assessment of Population Stratification	Imputation software	Imputation reference panel	Analysis software used	Covariates other than age and sex
1000BRAINS	Illumina Human OmniExpress12, Human CoreExome12, HumanOmni1-Quad, Infinium OmniExpressExome-8	Life & Brain GmbH Genomics Facility, University of Bonn	Illumina GenomeStudio	0.95	0.95	0.03	>1e-4	EIGENSTRAT	Sanger Imputation Server (PBWT 3.0)	1000 Genomes (phase 3 version 5)	EPACTS v3.2.6-patched	PC1-10
ABCD	Smokescreen Genotyping Array	University of Michigan's Neurogenomics and Informatics Core	Illumina GenomeStudio	0.97	0.97	0.01	>10-6	UMAP	Minimac4	Haplotype Reference Consortium (HRC) reference panel	rvtest	TIV, PC1-PC4
AGES	Illumina HumanCNV370 Duo BeadChip	NIA, NIH, USA	Illumina Bead Studio	0.97	> 0.98	> 0.01	> 10-6	EIGENSTRAT	MACH v 1.0.16	Backbone 1000G v3 all ethnicities	ProbABEL v0.1-9e	None
ARIC	Affymetrix GeneChip SNP Array 6.0	Broad Institute, USA	Birdseed	0.95	> 0.95	> 0.01	> 10-5	EIGENSTRAT	Michigan server HRC r1.1 imputation, IMPUTE 2	Haplotype Reference Consortium (HRC) reference panel (EA) ,1000G Phase1v3 (AF)	ProbABEL	Center, PC1-4
ASPS-FAM	Affymetrix Genome-Wide Human SNP Array 6.0	Medical University of Graz	Birdseed v2	0.98	0.98	0.05	5x10-6	EIGENSTRAT	Michigan server HRC r1.1 imputation	Haplotype Reference Consortium (HRC) reference panel	GWAS v2.2	None
BIL & GIN	Illumina InfiniumOmniExpressExome-8v1-4	Centre National de Génotypage (CNG), Evry, France	GenCall algorithm	0.95	0.95	0.01	1x10-6		Michigan server HRC r1.1 imputation, IMPUTE 2	Haplotype Reference Consortium (HRC) reference panel
CARDIA	Affymetrix 6.0 SNP array	Broad Institute, USA	Birdseed and BEAGLECALL	0.95	> 0.95	> 0.01	> 10-5	EIGENSTRAT	Michigan server HRC r1.1 imputation, BEAGLE version 3.3.2	Haplotype Reference Consortium (HRC) reference panel (EA) ,1000G Phase1v3 (AF)	ProbABEL	Center, TIV, PC1-2
FHS	Affymetrix GeneChip Human Mapping 500K Array +50K Human Gene Focused Panel	Affymetrix (Santa Clara), USA	Affymetrix BRLMM	0.97	> 0.98	≥ 0.01	> 10-6	EIGENSTRAT	Michigan server HRC r1.1 imputation	Haplotype Reference Consortium (HRC) reference panel	R version 2.15.3	PC3
HCP	Infinium Multi-Ethnic Genotyping Array	Washington University in St. Louis	Illumina GenomeStudio	0.95	0.95	0.01	>10-6	PLINK, PCA	Minimac4	Haplotype Reference Consortium (HRC) reference panel	rvtest
i-Share	Affymetrix Precision Medicine Axiom Array	McGill Genome Center , Canada	AxiomGT1 algorithm	0.95	0.98	NA	0.001	PLINK, PCA	Minimac4	Haplotype Reference Consortium (HRC) reference panel	rvtest	TIV, PC1-PC4
LBC 1936	Illumina 610 (Quad) Array	Wellcome Trust Clinical Research Facility Genetics Core, Western General Hospital, Edinburgh, UK	Illumina GenomeStudio	0.95	≥ 0.98	≥ 0.01	≥ 10-3	MDS	Michigan server HRC r1.1 imputation	Haplotype Reference Consortium (HRC) reference panel	PLINK2	ICV, PC1-3
LIFE-Adult	Affymetrix Axiom-CEU	Helmholtz Zentrum München (German Research Center for Environmental Health)	Illumina GenomeStudio	0.97	0.97	None	1x10-6	IBD matrix	Michigan server HRC r1.1 imputation	Haplotype Reference Consortium (HRC) reference panel	SNPtest v2.5
PING	Illumina Human 660W-Quad	Scripps Genomics Medicine and Pathology Center (Scripps Translational Science Institute) in La Jolla, California	Birdseed	0.98	0.98	0.01	> 10-6	PLINK, PCA	Minimac4	Haplotype Reference Consortium (HRC) reference panel	rvtest
OATS	Illumina Omni-Express	Diamantina Institute, QLD	Illumina BeadStudio	0.95	0.95	0.01	> 10-6	EIGENSTRAT	MACH / minimac	1000 Genomes (Version 3)	NA	NA
Rhineland Study	Illumina Omni-2.5 exome array	Life & Brain GmbH Genomics Facility, University of Bonn	Illumina GenomeStudio	0.95	0.95	0.01	1x10-6	EIGENSTRAT	IMPUTE2	1000 Genomes (Version 3)
ROSMAP	Affymetrix GeneChip 6.0, Illumina OmniQuad Express	Broad Institute of MIT and Harvard	Birdseed	> 0.95	> 0.95		> 0.001	EIGENSTRAT	Michigan server HRC r1.1 imputation	Haplotype Reference Consortium (HRC) reference panel	PLINK software, version 1.08p	NA
Rotterdam Study I	Illumina HumanHap550K(+Duo) and 610-Quad BeadChip	Erasmus MC, Rotterdam, the Netherlands	Illumina Bead Studio	0.975	> 0.98	> 0.01	> 10-6	IBD matrix	Michigan server HRC r1.1 imputation	Haplotype Reference Consortium (HRC) reference panel	ProbABEL v.0.4.4	ICV, PC1-4
Rotterdam Study II	Illumina HumanHap550-Duo BeadChip	Erasmus MC, Rotterdam, the Netherlands	Illumina Bead Studio	0.975	> 0.98	> 0.01	> 10-6	IBD matrix	Michigan server HRC r1.1 imputation	Haplotype Reference Consortium (HRC) reference panel	ProbABEL v.0.4.4	ICV, PC1-4
Rotterdam Study III	Illumina HumanHap610K-Quad	Erasmus MC, Rotterdam, the Netherlands	Illumina Bead Studio	0.975	> 0.98	> 0.01	> 10-6	IBD matrix	Michigan server HRC r1.1 imputation	Haplotype Reference Consortium (HRC) reference panel	ProbABEL v.0.4.4	ICV, PC1-4
Sydney MAS	Affymetrix GeneChip SNP Array 6.0 ®	Ramaciotti Centre, University of New South Wales, Sydney Australia	CRLMM (v1.10.0) in R	0.95	0.95	0.01	> 10-6	EIGENSTRAT	IMPUTE2	1000 Genomes (Version 3)	NA	NA
SYS	Affymetrix 6.0, Perlegen-Affymetrix 5.0, Illumina 660, Illumina 1M, Illumina 370K	Centre for Applied Genomics (TCAG)	Illumina GenomeStudio	>0.90	>.95	>1%	<10e-4		IMPUTE2	March 2012 1000G release (EUR reference panel)	ProbABEL Palinar	PC1,PC2,PC3,PC4
ToMMo	Affymetrix Axiom Japonica Array	Tokyo Medical and Dental University (TMDU) Genomics Center	Illumina GenomeStudio	0.95	0.95	0.01	> 10-5	PCA	IMPUTE2	3.5KJPNv2 scaffold	BOLT-LMM v2.3.2	TIV and PC1 to 10
UKBB	Applied Biosystems UK BiLEVE Axiom Array by Affymetrix (now part of Thermo Fisher Scientific); Applied Biosystems UK Biobank Axiom Array	Affymetrix Research Services Laboratory	Custom genotype calling pipeline	0.97		> 0.01	> 10-7	PCA	IMPUTE4	1000 Genomes reference panel	BOLT-LMM	TIV and PC1 to 10
SNP = Single Nucleotide Polymorphism; MRI = Magnetic Resonance Imaging; PSMD =Peak width of skeletonized mean diffusivity; PC = Principal Component; TIV = Total Intracranial Volume; ICV = Intracranial Volume; 1000Brains = ; AGES = AGES-Reykjavik Study; ARIC = Atherosclerosis Risk In Communities Study; AA = African American; EU = European Ancestry; 1000Brains = ; ABCD = Adolescent Brain and Cognit…
*Affymetrix SNP 6.0
† Illumina Omni 2.5

## Sheet: Suppl. Table-3
Supplementary Table 3. Image acquisition and processing
Study	Scanner	FOV (mm2)	Number	Voxel Size	# of b0 scans	# of gradient directions (b1=1000)	Reverse polarity acquisition
			of slices	(mm3)
1000BRAINS	3T Siemens Tim Trio	256x256	176	2x2x2	4	30	N
ABCD	3T Siemens Prisma, GE MR 750, Philips Achieva dStream and Ingenia	240x240	81	1.7x1.7x1.7	7	15	N
AGES	1.5T GE Signa Twinspeed	220x220	58	1.7x1.7x 3	1	11	N
ARIC	3T Siemens Verio, Skyra and Trio	240x240	59	2.7x2.7x 2.7-3	1	64	N
ASPS-FAM	3T whole body Siemens TimTrio	256x256	50	2x2x2.5	4	12 (rep. 4)	N
BIL & GIN	3T Philips Achieva	224x224	70	2x2x2	2	40	Y
CARDIA	3T Siemens Tim Trio	246x246	64	2.2x2.2x2.2	3	30	N
	3T Philips Achieva	256x256	67	0.76x0.76x2	1	30	N
FHS	1.5T Siemens Avanto	230x230	25	1.8x1.8x5	4	30 (rep. 4)	N
	3T Siemens Magnetum Verio	230x230	25	1.8x1.8x5	12	30 (rep. 3)	N
HCP	3T Siemens Tesla Skyra	210x180	111	1.2x1.2x	6	84	N
i-Share	3T Siemens Magnetom Prisma	206x206	84	1.75x1.75x1.75	8	84	N
LBC1936	1.5T GE Signa Horizon HDx	256x256	72	2x2x2	7	64	N
LIFE-Adult	3T Siemens Magnetom Verio	220x220	72	1.7x1.7x1.7	7	60	N
OATS	1.5T Philips Gyroscan, Siemens Magnetom Avanto, Sonata; 3T Philips Achieva	240x240	55	2.5x2.5x2.5	1	32	N
PING	3T Philips Achieva; Siemens TrioTim; GE Signa and Discovery	256x256	64	2x2x2	1	30	Y
Rhineland Study	3T Siemens MAGNETOM Prisma	240x240	70	2x2x2	≥1	30	N
ROSMAP	3T Philips Achieva	256x256	80	2x2x2	5	40	Y
RS-I/II/III	1.5 T GE Signa Excite	210x210	39	3.3x2.2x3.5	3	25	N
Sydney MAS	3 T Philips Achieva Quasar Dual	240x240	55	1x1x2.5	1	32	Y
SYS	1.5 T Siemens Avanto	256x256	70	2.3x2.3x3.0	1	64	N
ToMMo	3T Philips Medical System Ingenia	224x224	60	2x2x2	1	32	N
UKBB	3T Siemens Skyra	104x104	36	2.0x2.0x2.0	5	50	Y
ABCD : Adolescent Brain and Cognitive Development; AGES : AGES-Reykjavik Study; ARIC : Atherosclerosis Risk In Communities Study; AA : African American; EU : European Ancestry; ASPS-Fam : Austrian Stroke Prevention Family Study; BIL & GIN: ; CARDIA : Coronary Artery Risk Development in Young Adults; FHS : Framingham Heart Study; HCP: Human Connectome Project; i-Share : Internet-based Students' He…

## Sheet: Suppl. Table-4
Supplementary Table 4. Genomic inflation factor (λ, lambda) for individual studies and meta-analyses
Study	Main effects	Age stratified*
	PSMD: Full model	PSMD: Age 18-35	PSMD: Age 35-65	PSMD: Age > 65
1000BRAINS	1.003	-	0.995	1.005
ABCD	-	1	-	-
AGES-gsa	1.011	-	-	1.011
AGES-hu370CNV	1.012	-	-	1.012
ARIC-AA	1.049	-	-	-
ARIC-EUR	1.013	-	-	1.013
ASPS-Fam	1.044	-	1.094	1.069
BIL & GIN	0.995	1.002	-	-
CARDIA - AA	1.027	-	-	-
CARDIA - EUR	1.045	-	1.073	-
FHS	1.014	1.05	1.017	1.01
HCP	1		-	-
i-Share	1.018	1.015	-	-
LBC1936	1	-	-	1
LIFE-Adult	1.007	1.003	1	1.006
OATS	1.017	-	-	1.017
PING	0.97	0.97	-	-
Reihnland Study	0.997	1.019	1.003	1.016
ROSMAP-Batch1	1.126	-	-	1.126
ROSMAP-Batch2	1.156	-	-	1.156
RSI	1.033	-	-	1.042
RSII	1.024	-	-	1.028
RSIII	1.021	-	1.017	1.062
Sydney MAS	1.047	-	-	1.047
SYS	0.994	-	0.994	-
UKBB	1.086	-	1.056	1.051
ToMMo	1	0.99	1	1
Meta-Analysis AA	1.024	-	1	1
Meta-Analysis EAS	1	0.99	1	1
Meta-Analysis EUR	1.06	1.01	1.03	1.04
Meta-Analysis Overall	1.01	0.99	1.01	1
EUR = European Ancestry; AA = African-American
* Age stratified main effects are assessed as in Model 1 adjusted for age, sex, principal components for population stratification, total intracranial volume)

## Sheet: Suppl. Table 5
Supplementary Table 5. European ancestry inverse variance weighted (IVW) meta-analysis of GWAS for Peak width of Skeletonized Mean Diffusivity (PSMD)
Locus	SNP	CHR:POS	A1/A2	A1-Freq	Function	Nearset gene(s)	β	SE	P-value	Direction
PSMD: Full model
1q41	rs10494988	1:215141570	T/C	0.37	intergenic	CENPF,KCNK2	-0.00554732	0.000641309	5.142e-18	--+-++--++++-+++-++++-+
10q24.33	rs10786776	10:105662994	A/G	0.6	intronic	STN1	0.00440967	0.000632665	3.169e-12	+++++++++++++++++-++--+
17p13.3	rs2131704	17:1970898	T/C	0.58	intronic	SMG6	-0.00425295	0.000628298	1.298e-11	--++++---++++-++++-++++
6q25.1	rs62434144	6:151023804	T/C	0.4	intronic	PLEKHG1	0.00424264	0.000639575	1.95e-11	++-++++-+-++++++-++++++
3q28	rs13060370	3:190653006	A/G	0.3809	intergenic	SNAR-I	-0.00427011	0.000639429	2.428e-11	-+++++++++++++++-++++++
17q25.1	rs7207180	17:73881056	C/G	0.29	intergenic	TRIM47	0.00419293	0.000681889	7.784e-10	+-+----+++--+-+-+-+--+-
20q13.33	rs7271454	20:61143279	T/C	0.45	ncRNA_exonic	C20orf166-AS1	-0.00380619	0.000623761	1.05e-09	----------------?------
8q24.21	rs5018867	8:131119429	T/C	0.69	intronic	ASAP1	-0.00486795	0.000799072	1.118e-09	-?-?????????-??-?????--
16q24.33	rs1045814	16:89762915	T/C	0.38	UTR3	SPATA2L	0.00384766	0.000640423	1.881e-09	++---------------------
6p22.1	rs116358736	6:28727593	A/T	0.28	intergenic	LOC401224,SCAND3	-0.00411234	0.000690917	2.654e-09	--+---+-++--+-+--------
5q23.2	rs2303655	5:121518378	T/C	0.81	downstream	LOC100505841	0.00471895	0.000796044	3.062e-09	++----+-------+--------
6p25.3	rs12525352	6:1365883	C/G	0.11	intergenic	FOXQ1,FOXF2	0.00564653	0.00100921	2.209e-08	++-+-++---+-----??+-++-
3q24	rs1397886	3:146427279	A/T	0.62	intergenic	PLSCR5	-0.00351212	0.000640897	4.255e-08	-++-+++++++-++-+-++++++
PSMD: Age 35-65
3q28	rs13066753	3:190647187	T/C	0.38	intergenic	SNAR-I	-0.00594355	0.000944319	3.084e-10	---------
1q41	rs1452628	1:215139887	A/T	0.62	intergenic	CENPF,KCNK2	0.00542989	0.000946468	9.628e-09	+-+++++-+
PSMD: Age > 65
1q41	rs76641944	1:215152832	A/T	0.07	intergenic	CENPF,KCNK2	-0.013105	0.00175014	6.971e-14	----+----+-??----
10q24.33	rs2475214	10:105660986	T/C	0.6	intronic	STN1	0.006089	0.000918125	3.321e-11	++++++++++-+-++-+
17q25.1	rs11868794	17:73890873	A/G	0.29	intronic	TRIM65	0.00637905	0.000995016	1.449e-10	-++++-+-+-+-+-+-+
6q25.1	rs62434144	6:151023804	T/C	0.4	intronic	PLEKHG1	0.0053757	0.000918609	4.85e-09	++++-++++++-+++++
3q24	rs143994532	3:146453481	C/G	0.62	intergenic	PLSCR5	-0.00534218	0.000929237	8.954e-09	----+-----++-+---
6p21.33	rs114837463	6:31807540	A/G	0.88	UTR3	C6orf48	0.00784872	0.00137504	1.146e-08	-++++++-++++?++++
2q32.1	rs7576060	2:188073163	T/C	0.35	intergenic	CALCRL	-0.00526411	0.000942206	2.304e-08	---------+--+----
6p22.1	rs2523808	6:29849657	T/C	0.76	intergenic	HLA-G,HLA-H	0.00590659	0.00106119	2.613e-08	-+++-++-+-+++++++
5q23.2	rs2303655	5:121518378	T/C	0.82	downstream	LOC100505841	0.00646191	0.00116641	3.032e-08	++++--+++-++-++++
2q33.2	rs140244541	2:203808532	A/G	0.15	intronic	NBEAL1	-0.00690837	0.00124745	3.061e-08	--+----+-+--?----
PSMD indicates peak width of skeletonized mean diffusivity; A1, Allele1; A2, Allele2; A1-Freq1, allele1 frequency; the association direction of the EA for European

## Sheet: Suppl. Table 6
Supplementary Table 6. Association of genome-wide significant Peak Width of Skeletonized Mean Diffusivity (PSMD) loci without TIV adjustment
						Full Model without TIV adjustment
					Meta-Analysis EUR
Locus	SNP	CHR:POS	gene	A1/A2	A1-Freq	β	SE	P-value
1q41	rs10494988	1:215141570	CENPF,KCNK2	T/C	0.3752	-0.00586741	0.000640617	5.227e-20
6q25.1	rs275350	6:151016058	PLEKHG1	C/G	0.4117	0.00447034	0.000630246	1.31e-12
3q28	rs13060370	3:190653006	SNAR-I,OSTN	A/G	0.3809	-0.00448577	0.000638726	2.172e-12
17p13.3	rs2131704	17:1970898	SMG6	T/C	0.5771	-0.00439432	0.00062785	2.579e-12
10q24.33	rs2475213	10:105664459	OBFC1	A/T	0.6426	0.00422053	0.000647221	6.979e-11
17q25.1	rs9901840	17:73889412	TRIM65	A/T	0.2947	0.00421876	0.000680336	5.594e-10
16q24.3	rs1045814	16:89762915	SPATA2L	T/C	0.3783	0.0038867	0.000639575	1.227e-09
20q13.33	rs7271454	20:61143279	C20orf166-AS1	T/C	0.455	-0.00361206	0.000623414	6.88e-09
6p22.1	rs116358736	6:28727593	SCAND3,LOC401242	A/T	0.2829	-0.00398173	0.000688643	7.394e-09
8q24.21	rs5018867	8:131119429	ASAP1	T/C	0.6903	-0.00459648	0.000798554	8.634e-09
5q23.2	rs2303655	5:121518378	LOC100505841	T/C	0.8102	0.00453775	0.000790963	9.621e-09
2q14.1	rs1465817	2:113286492	TTL	A/T	0.151	-0.00485617	0.000866863	2.114e-08
6p25.3	rs12525352	6:1365883	FOXQ1,FOXF2	C/G	0.1102	0.00546425	0.000992058	3.623e-08
Meta-Analysis EUR = Meta-Analysis in European Ancestry; SNP = Single Nucleotide Polymorphism; A1 = Allele1; A2 = Allele2; β = effect estimate; SE = Standard Error; P = P-value

## Sheet: Suppl. Table 7
Supplementary Table 7. Conditional and joint multiple-SNP analysis of PSMD GWAS summary statistics (GCTA-cojo)
Locus	Chr	SNP	rsID	SNPs previously identified	gene	refA	freq	b	se	p	n	freq_geno	bJ	bJ_se	pJ	LD_r
PSMD: Full model
1q41	1	1:215141570	rs10494988	EUR/TRANS	CENPF,KCNK2	T	0.3741	-0.00554732	0.000641309	5.14994e-18	51847.7	0.38388	-0.00554732	0.000641765	5.43506e-18	0
3q24	3	3:146427279	rs1397886	EUR	PLSCR5	A	0.6247	-0.00351212	0.000640897	4.25326e-08	51892.5	0.615734	-0.00351212	0.000641077	4.29025e-08	0
3q28	3	3:190653006	rs13060370	EUR + ALL	SNAR-I	A	0.3797	-0.00427011	0.000639429	2.42225e-11	51877.9	0.373324	-0.00427011	0.000639698	2.46902e-11	0
5q23.2	5	5:121518378	rs2303655	EUR + ALL	LOC100505841	T	0.8131	0.00471895	0.000796044	3.06646e-09	51887.4	0.810217	0.00471895	0.000796305	3.10307e-09	0
6p25.3	6	6:1365883	rs12525352	EUR	FOXQ1,FOXF2	C	0.1061	0.00564653	0.00100921	2.20622e-08	51731.2	0.10017	0.00564653	0.00100951	2.22714e-08	0
6p22.1	6	6:28727593	rs116358736	EUR + ALL	LOC401224,SCAND3	A	0.2803	-0.00411234	0.000690917	2.64885e-09	51887.1	0.221452	-0.00411234	0.000691147	2.68099e-09	0
6q25.1	6	6:151023804	rs62434144	EUR + ALL	PLEKHG1	T	0.4045	0.00424264	0.000632286	1.94624e-11	51877.5	0.414394	0.00424264	0.000632554	1.98456e-11	0
8q24.21	8	8:131119429	rs5018867	EUR	ASAP1	T	0.6904	-0.00486795	0.000799072	1.11509e-09	36599.2	0.689552	-0.00486795	0.000799466	1.1362e-09	0
10q24.33	10	10:105459116	rs4630220	EUR	SH3PXD2A	A	0.2841	-0.00381552	0.0006881	2.93954e-08	51891.8	0.272461	-0.00380264	0.0006883	3.30067e-08	-0.00269045
10q24.33	10	10:105662994	rs10786776	EUR/TRANS	STN1	A	0.597	0.00440967	0.000632665	3.16941e-12	51873.9	0.619279	0.00440027	0.000632957	3.6035e-12	0
16q24.33	16	16:89762915	rs1045814	EUR + ALL	SPATA2L	T	0.3767	0.00384766	0.000640423	1.87826e-09	51886.4	0.306288	0.00384766	0.00064064	1.90192e-09	0
17p13.3	17	17:1970898	rs2131704	EUR + ALL	SMG6	T	0.5778	-0.00425295	0.000628298	1.29676e-11	51876.7	0.599938	-0.00425295	0.000628569	1.3232e-11	0
17q25.1	17	17:73881056	rs7207180	EUR	TRIM47	C	0.2929	0.00419293	0.000681889	7.7973e-10	51884.7	0.317691	0.00419293	0.00068213	7.90518e-10	0
20q13.33	20	20:61143279	rs7271454	EUR + ALL	C20orf166-AS1	T	0.4546	-0.00380619	0.000623761	1.04749e-09	51795.3	0.437201	-0.00380619	0.000623979	1.06157e-09	0
PSMD: Age 35-65
1q41	1	1:215139887	rs1452628	EUR	CENPF,KCNK2	A	0.6237	0.00542989	0.000946468	9.63683e-09	23750.6	0.61612	0.00542989	0.000947103	9.85826e-09	0
3q28	3	3:190647187	rs13066753	EUR + ALL	SNAR-I	T	0.3807	-0.00594355	0.000944319	3.09388e-10	23743.9	0.372399	-0.00594355	0.000945087	3.19747e-10	0
PSMD: Age > 65
1q41	1	1:215152832	rs76641944	EUR	CENPF,KCNK2	A	0.0718	-0.013105	0.00175014	6.9931e-14	24439.4	0.0919248	-0.013105	0.00175211	7.45618e-14	0
2q32.1	2	2:188073163	rs7576060	EUR + ALL	CALCRL	T	0.3532	-0.00526411	0.000942206	2.31026e-08	24624.3	0.38049	-0.00526411	0.000942784	2.35623e-08	0
2q33.2	2	2:203808532	rs140244541	EUR	NBEAL1, ICA1L	A	0.1546	-0.00690837	0.00124745	3.05945e-08	24554.8	0.165896	-0.00690837	0.0012482	3.11838e-08	0
3q24	3	3:146453481	rs143994532		PLSCR5	C	0.623	-0.00534218	0.000929237	8.97728e-09	24622.4	0.614424	-0.00534218	0.000929842	9.17788e-09	0
5q23.2	5	5:121518378	rs2303655		LOC100505841	T	0.8177	0.00646191	0.00116641	3.02472e-08	24624.8	0.810217	0.00646191	0.00116711	3.08289e-08	0
6p22.1	6	6:28839317	rs365823		LOC401242,TRIM27	T	0.9496	0.00408115	0.0020972	0.0516547	23750.7	0.955925	0.458147	0.00251387	3.2837e-74	0.09163
6p22.1	6	6:29815787	rs116525422		HLA-G,HLA-H	T	0.2398	-0.00143025	0.00105476	0.175099	24653.6	0.266297	-0.748177	0.00272389	4.32349e-166	-0.72589
6p22.1	6	6:29831058	rs115812585		HLA-G,HLA-H	A	0.4422	-0.0044123	0.000906761	1.1388e-06	24631.8	0.591077	-0.864276	0.00283523	4.31652e-204	0.168481
6p22.1	6	6:29848057	rs28849176		HLA-G,HLA-H	A	0.4486	0.00263494	0.000905479	0.00361429	24647	0.586531	0.845111	0.00105573	1.19452e-15	-0.295011
6p22.1	6	6:29849657	rs2523808		HLA-G,HLA-H	T	0.7644	0.00590659	0.00106119	2.60653e-08	24624.5	0.826707	0.00664083	0.00223054	8.91561e-195	-0.0221622
6p21.33	6	6:30748297	rs115908334		IER3,DDR1	A	0.9629	-0.0087145	0.00242744	0.000330678	23741.6	0.94483	-0.206773	0.00260441	2.03243e-15	0.338335
6p21.33	6	6:30951561	rs116023984		MUC21	T	0.8212	0.00435229	0.00117693	0.000217305	24571.8	0.985976	0.774538	0.00124995	5.7707e-10	-0.00869717
6p21.33	6	6:31807540	rs114837463		C6orf48	A	0.8774	0.00784872	0.00137504	1.14311e-08	24552.9	0.933195	0.00792742	0.00137598	8.34752e-09	0
6q25.1	6	6:151023804	rs62434144		PLEKHG1	T	0.4017	0.0053757	0.000918609	4.85697e-09	24621.2	0.414394	0.0053757	0.000919229	4.9736e-09	0
10q24.33	10	10:105459116	rs4630220		SH3PXD2A	A	0.2849	-0.0060562	0.000997727	1.2791e-09	24618.6	0.272461	-0.00603845	0.000998457	1.46853e-09	-0.00269045
10q24.33	10	10:105660986	rs2475214		STN1	T	0.597	0.006089	0.000918125	3.31169e-11	24611.5	0.619279	0.00607405	0.000918929	3.84519e-11	0
17q25.1	17	17:73890873	rs11868794		TRIM65	A	0.2875	0.00637905	0.000995016	1.44568e-10	24614.4	0.313993	0.00637905	0.000995826	1.49599e-10	0
In bold secondary association signals identified with GCTA-COJO analyses

## Sheet: Suppl. Table 8
Supplementary Table 8. Genetics variants associated with PSMD (5x10-8<p-value<5x10-6) in the cross-ancestry meta-analysis
SNP	chr:position	A1/A2	A1-Freq	Function	Nearest gene	Direction	N	p-value
PSMD: Full model with TIV adj.
rs10494988	1:215141570	T/C	0.3899	intergenic	KCNK2	---	58403	1.419e-17
rs13060370	3:190653006	A/G	0.3759	intergenic	SNAR-I	-+-	58403	1.279e-11
rs2475213	10:105664459	A/T	0.6149	intronic	STN1	+++	58403	7.893e-11
rs58510811	1:65311116	C/T	0.244	intronic	JAK1	+++	43117	1.285e-09
rs11170650	12:54092139	A/G	0.5072	intergenic	ATP5G2	---	58403	3.62e-08
rs62434144	6:151023804	T/C	0.3984	intronic	PLEKHG1	+++	58403	8.932e-08
rs111562228	5:121522778	A/C	0.1687	intergenic	LOC100505841	---	58403	3.242e-07
rs12373841	2:187757375	A/G	0.8234	intergenic	ZSWIM2	+++	58403	2.588e-06
rs416568	6:29647628	A/T	0.3117	intergenic	ZFP57	---	58403	4.302e-07
rs114399318	8:131450153	T/G	0.7219	intronic	ASAP1	-+-	43117	1.46e-06
rs648411	6:16744500	C/G	0.5254	intronic	ATXN1	---	58403	2.803e-06
rs1983344	11:28732659	T/C	0.6642	intergenic	METTL15	+++	58403	3.316e-06
rs7299457	12:95480709	T/C	0.2484	intronic	FGD6	---	58403	1.691e-06
rs1446422	12:118252675	A/G	0.1273	intronic	KSR2	---	58243	3.284e-06
rs9931120	16:89501357	A/G	0.4822	intronic	ANKRD11	+++	58403	1.044e-06
rs2131704	17:1970898	T/C	0.545	intronic	SMG6	---	58403	3.787e-13
rs187957	19:18628516	A/T	0.8658	intronic	ELL	-+-	58333	7.777e-08
PSMD: Age 18-35
rs187044908	7:134135335	T/G	0.013	intronic	AKR1B1	?+	858	1.849e-06
rs2683591	10:126562802	T/C	0.58	intergenic	FAM175B	++	4269	2.095e-06
rs785639	1:82801007	T/C	0.38	-	-	+?	3411	2.704e-06
rs8094384	18:1962338	A/G	0.6693	-	-	-?	2884	4.296e-06
rs4925375	20:60902883	T/C	0.7396	intronic	LAMA5	--	4269	4.474e-06
rs10836859	11:37781222	A/G	0.596	intergenic	C11orf74	++	4269	4.632e-06
PSMD: Age 36-65
rs1159211	3:190666643	T/C	0.3738	intergenic	SNAR-I	---	26941	1.766e-09
rs10494988	1:215141570	T/C	0.3866	intergenic	KCNK2	---	26941	1.39e-08
rs57658975	1:202616589	A/C	0.2148	intronic	SYT2	++?	23926	1.104e-07
rs2256298	1:65330682	A/G	0.2465	intronic	JAK1	+-+	26941	1.84e-07
rs4073081	8:145013893	C/G	0.6292	intronic	PLEC	+?+	26797	4.577e-07
rs3213229	11:2155876	T/C	0.0749	intronic	IGF2	+??	23696	6.938e-07
rs34166343	21:19396910	A/G	0.1094	intronic	CHODL	-?-	26711	1.052e-06
rs851377	2:19460241	T/C	0.1763	intergenic	MIR4757	---	26941	1.726e-06
rs4504343	5:59948395	C/G	0.567	intronic	DEPDC1B	--?	23926	1.827e-06
rs72710612	9:32370026	A/G	0.76	intergenic	ACO1	-+-	26941	1.897e-06
rs6062411	20:61757047	T/C	0.3455	intergenic	HAR1A	-??	23782	2.767e-06
rs147773159	14:39873797	T/C	0.9478	intronic	FBXO33	+??	23696	3.16e-06
rs72770496	16:24972913	A/G	0.0745	intronic	ARHGAP17	---	26855	3.48e-06
PSMD: Age > 65
rs1452628	1:215139887	A/T	0.6104	intergenic	KCNK2	+++	27119	5.931e-14
rs2475214	10:105660986	T/C	0.5746	intronic	STN1	+++	27119	6.366e-11
rs113610005	6:29860879	A/G	0.7498	intergenic	HLA-H	+++	27119	2.976e-08
rs62171919	2:187733825	A/C	0.4086	intergenic	ZSWIM2	+++	27119	3.753e-08
rs116219813	2:204081675	T/C	0.1226	intronic	NBEAL1	--?	24961	8.232e-08
rs62434144	6:151023804	T/C	0.3963	intronic	PLEKHG1	+-+	27119	9.559e-08
rs116379234	6:32295878	A/G	0.2158	intronic	C6orf10	---	27119	1.406e-07
rs7271454	20:61143279	T/C	0.4454	ncRNA_exonic	C20orf166-AS1	---	27029	3.393e-07
rs79061545	13:32000716	C/G	0.8816	intergenic	B3GALTL	+++	25223	4.642e-06
rs1397886	3:146427279	A/T	0.6364	intronic	PLSCR5	---	27119	3.661e-07
rs12445513	16:6903081	T/C	0.2315	intronic	RBFOX1	---	27119	4.879e-07
rs146018770	5:26263614	A/G	0.9805	intergenic	CDH9	-??	22328	9.019e-07
rs2131704	17:1970898	T/C	0.5467	intronic	SMG6	---	27119	9.558e-07
rs11948266	5:121522316	T/C	0.8327	intergenic	LOC100505841	+++	27119	9.789e-07
rs80216991	9:71308722	A/G	0.0411	intergenic	PIP5K1B	+??	23786	3.091e-06
rs9321054	6:126079968	A/G	0.5188	intronic	HEY2	---	27119	3.154e-06
rs1662744	17:41992496	C/G	0.5054	intergenic	FAM215A	-+-	27119	3.374e-06
rs78951637	13:37404133	A/G	0.1603	downstream	RFXAP	+-+	26959	3.384e-06
rs8014609	14:99317178	T/C	0.3884	intergenic	C14orf177	+++	27119	3.613e-06

## Sheet: Suppl. Table 9
Supplementary Table 9. Loci reaching GW significance in the multiancestry meta-analysis using MR-MEGA
PSMD Model	rsID	chr:position	EA/OA	EAF	Functional annotation	Nearest gene	Analysis	Direction	N total	N cohorts	p-MRMega	p-het-ancestry	p-het-residual
PSMD: Full model	rs10494988	1:215141570	C/T	0.609713	intergenic	CENPF,KCNK2	EUR/TRANS	+-++--++-++-++-+-++++-+-++	58403	26	2.65413e-16	0.118934	0.0146059
	rs2131704	17:1970898	C/T	0.453802	intronic	SMG6	EUR/TRANS	++++---+-+++-+-+++-+++++-+	58403	26	3.54159e-11	0.928176	0.208624
	rs10786773	10:105644275	A/T	0.615028	intronic	STN1	EUR/TRANS (r²=0.6 with rs10786776)	++++++-+++++++-++-++--++++	58403	26	6.14398e-10	0.0389045	0.00831891
	rs13060370	3:190653006	G/A	0.625871	intergenic	SNAR-I,OSTN	EUR/TRANS	++++++++-+++++++-+++++++-+	58403	26	1.0839e-09	0.741974	0.357133
	rs8122282	20:61152322	G/A	0.46954	intronic	C20orf166	EUR/TRANS (r²=0.88 with rs8122282)	------------+---?-------??	52208	23	1.75084e-08	0.0449982	0.813631
	rs58510811	1:65311116	G/C	0.763474	intronic	JAK1	TRANS	-???????-??-???-?????---+-	43117	9	4.47184e-07	0.55699	0.720238
PSMD: Age 35-65	rs58510811	1:65311116	G/C	0.766114	intronic	JAK1	TRANS	-???--?--+-	22316	7	1.0017e-08	0.334344	0.798951
	rs10820951	9:94966780	G/A	0.534748	intergenic	LINC00475,IARS	TRANS	+-++++-++--	26941	11	1.39692e-08	3.91031e-08	0.229566
PSMD: Age > 65	rs1452628	1:215139887	A/T	0.611665	intergenic	CENPF,KCNK2	EUR/TRANS	+-+++++-+++-+++++++	27119	19	1.77398e-11	0.946733	0.0844299
	rs4512211	6:10271276	C/T	0.0196602	intergenic	LOC100506207,TFAP2A	TRANS	???-?-???????+-?++?	19045	6	7.10304e-11	2.30692e-10	0.000773694
	rs1973114	17:73877097	C/T	0.699815	intronic	TRIM47, TRIM65	EUR/TRANS (r²=0.89 with rs11868794)	+??????+??-?????---	19153	6	9.9068e-10	0.002071	0.357705
	rs2475214	10:105660986	T/C	0.577588	intronic	STN1	TRANS	++++++++++-+-++-+++	27119	19	5.20095e-09	0.733726	0.134959
	rs115284607	6:29833779	A/G	0.762961	intergenic	HLA-G,HLA-H	TRANS	-+++-++-+-++++++++?	25031	18	1.84819e-08	0.0178289	0.64026
EA = Effect Allele; EAF = Effect Allele Frequency; p-MRMega = P-value MR-MEGA analysis; p-het-ancestry = heterogenity P-value due to ancestry; P-het-residual = residual heterogeneity P-value
Novel genome-wide significant risk loci, not identified in the inverse-variance weighted meta-analysis, are in bold
There was no significant association for PSMD in Age stratum1 using MR-MEGA
r² was estimated using LD reference from European 1000G reference panel

[truncated: 22 more sheets: Suppl. Table 10, Suppl. Table 11, Suppl. Table 12, Suppl. Table 13, Suppl. Table-14, Suppl. Table 15, Suppl. Table 16, Suppl. Table 17, Suppl. Table 18, Suppl. Table 19, Suppl. Table 20, Suppl. Table 21, Suppl. Table 22, Suppl. Table 23, Suppl. Table 24, Suppl. Table 25, Suppl. Table 26, Suppl. Table 27, Suppl. Table 28 , Suppl. Table 29 …]
